# Supplementary material for: Protocol for a mixed-method analysis of implementation of case management in primary care for frequent users of healthcare services with chronic diseases and complex care needs
Source: PubMed Central journal article supplement — BMJ Open. 2020 Jun 1;10(6):e038241. doi: 10.1136/bmjopen-2020-038241 (PMC7265033; doi:10.1136/bmjopen-2020-038241), 2020-06-01
Supplement: bmjopen-2020-038241.draft_revisions.pdf [file bmjopen-2020-038241.draft_revisions.pdf]

# BMJ Open

BMJ Open is committed to open peer review. As part of this commitment we make the peer review history of every article we publish publicly available.

When an article is published we post the peer reviewers' comments and the authors' responses online. We also post the versions of the paper that were used during peer review. These are the versions that the peer review comments apply to.

The versions of the paper that follow are the versions that were submitted during the peer review process. They are not the versions of record or the final published versions. They should not be cited or distributed as the published version of this manuscript.

BMJ Open is an open access journal and the full, final, typeset and author-corrected version of record of the manuscript is available on our site with no access controls, subscription charges or pay-per-view fees (<http://bmjopen.bmj.com>).

If you have any questions on BMJ Open's open peer review process please email [info.bmjopen@bmj.com](mailto:info.bmjopen@bmj.com)

# BMJ Open

## Protocol for a mixed-method analysis of implementation of case management in primary care for frequent users of health care services with chronic diseases and complex care needs

|                               |                                                                                                                                                                                                                                                                                                                                                                                                                                                                                                                                                                                                                                                                                                                                                                                                                                                             |
|-------------------------------|-------------------------------------------------------------------------------------------------------------------------------------------------------------------------------------------------------------------------------------------------------------------------------------------------------------------------------------------------------------------------------------------------------------------------------------------------------------------------------------------------------------------------------------------------------------------------------------------------------------------------------------------------------------------------------------------------------------------------------------------------------------------------------------------------------------------------------------------------------------|
| Journal:                      | <i>BMJ Open</i>                                                                                                                                                                                                                                                                                                                                                                                                                                                                                                                                                                                                                                                                                                                                                                                                                                             |
| Manuscript ID                 | bmjopen-2020-038241                                                                                                                                                                                                                                                                                                                                                                                                                                                                                                                                                                                                                                                                                                                                                                                                                                         |
| Article Type:                 | Protocol                                                                                                                                                                                                                                                                                                                                                                                                                                                                                                                                                                                                                                                                                                                                                                                                                                                    |
| Date Submitted by the Author: | 04-Mar-2020                                                                                                                                                                                                                                                                                                                                                                                                                                                                                                                                                                                                                                                                                                                                                                                                                                                 |
| Complete List of Authors:     | Danish, Alya; Universite de Sherbrooke - Campus de Longueuil, Faculté de médecine et des sciences de la santé<br>Chouinard, Maud-Christine; Université du Québec à Chicoutimi, Sciences de la santé<br>Aubrey-Bassler, Kris; Memorial University of Newfoundland<br>Burge, Fred ; Dalhousie University<br>Doucet, Shelley; University of New Brunswick, Department of Nursing and Health Sciences<br>Ramsden, Vivian; University of Saskatchewan, Department of Academic Family Medicine<br>Bisson, Mathieu; Universite de Sherbrooke<br>Cassidy, Monique<br>Condran, Brian; Dalhousie University<br>Lambert, Mireille; Centre intégré universitaire de santé et de services sociaux du Saguenay-Lac-Saint-Jean<br>Penney, Carla; Memorial University of Newfoundland<br>Sabourin, Véronique<br>Warren, Mike<br>Hudon, Catherine; Université de Sherbrooke, |
| Keywords:                     | PRIMARY CARE, QUALITATIVE RESEARCH, Organisation of health services < HEALTH SERVICES ADMINISTRATION & MANAGEMENT, Protocols & guidelines < HEALTH SERVICES ADMINISTRATION & MANAGEMENT                                                                                                                                                                                                                                                                                                                                                                                                                                                                                                                                                                                                                                                                     |
|                               |                                                                                                                                                                                                                                                                                                                                                                                                                                                                                                                                                                                                                                                                                                                                                                                                                                                             |

SCHOLARONE™  
Manuscripts

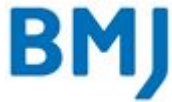

I, the Submitting Author has the right to grant and does grant on behalf of all authors of the Work (as defined in the below author licence), an exclusive licence and/or a non-exclusive licence for contributions from authors who are: i) UK Crown employees; ii) where BMJ has agreed a CC-BY licence shall apply, and/or iii) in accordance with the terms applicable for US Federal Government officers or employees acting as part of their official duties; on a worldwide, perpetual, irrevocable, royalty-free basis to BMJ Publishing Group Ltd ("BMJ") its licensees and where the relevant Journal is co-owned by BMJ to the co-owners of the Journal, to publish the Work in this journal and any other BMJ products and to exploit all rights, as set out in our [licence](#).

The Submitting Author accepts and understands that any supply made under these terms is made by BMJ to the Submitting Author unless you are acting as an employee on behalf of your employer or a postgraduate student of an affiliated institution which is paying any applicable article publishing charge ("APC") for Open Access articles. Where the Submitting Author wishes to make the Work available on an Open Access basis (and intends to pay the relevant APC), the terms of reuse of such Open Access shall be governed by a Creative Commons licence – details of these licences and which [Creative Commons](#) licence will apply to this Work are set out in our licence referred to above.

Other than as permitted in any relevant BMJ Author's Self Archiving Policies, I confirm this Work has not been accepted for publication elsewhere, is not being considered for publication elsewhere and does not duplicate material already published. I confirm all authors consent to publication of this Work and authorise the granting of this licence.

1  
2  
3 1 **Protocol for a mixed-method analysis of implementation of case management in primary care for**  
4  
5 2 **frequent users of health care services with chronic diseases and complex care needs**  
6  
7 3

8  
9  
10 4 Danish A<sup>1</sup>, Chouinard MC<sup>2</sup>, Audrey-Bassler K<sup>3</sup>, Burge F<sup>4</sup>, Doucet S<sup>5</sup>, Ramsden V<sup>6</sup>, Bisson M<sup>1</sup>, Cassidy M<sup>5</sup>,  
11  
12 5 Condran B<sup>4</sup>, Lambert M<sup>2</sup>, Penney C<sup>3</sup>, Sabourin V<sup>7</sup>, Warren M<sup>8</sup>, Hudon C<sup>1,9</sup>.  
13  
14 6

15  
16  
17 7 <sup>1</sup>Department of Family Medicine and Emergency Medicine, Université de Sherbrooke, Sherbrooke,  
18  
19 8 Québec, Canada

20  
21 9 <sup>2</sup>Department of Health Sciences, Université du Québec à Chicoutimi, Chicoutimi, Québec, Canada

22  
23 10 <sup>3</sup>Primary Healthcare Research Unit, Memorial University, St-John's, Newfoundland and Labrador,  
24  
25 11 Canada

26  
27  
28 12 <sup>4</sup>Department of Family Medicine, Dalhousie University, Halifax, Nova Scotia, Canada

29  
30 13 <sup>5</sup>Department of Nursing and Health Sciences, University of New Brunswick, Fredericton, New Brunswick,  
31  
32 14 Canada

33  
34 15 <sup>6</sup>Department of Academic Family Medicine, University of Saskatchewan, Saskatoon, Saskatchewan,  
35  
36 16 Canada

37  
38  
39 17 <sup>7</sup>Quebec-SPOR SUPPORT unit, Québec, Québec, Canada

40  
41 18 <sup>8</sup>NL SPOR SUPPORT Unit, St. John's, Newfoundland and Labrador, Canada

42  
43 19 <sup>9</sup>Centre hospitalier universitaire de Sherbrooke Research Center, Sherbrooke, Quebec, Canada  
44  
45 20

46  
47  
48 21 Corresponding author: Alya Danish; [alya.danish@usherbrooke.ca](mailto:alya.danish@usherbrooke.ca)  
49  
50 22

51  
52 23 **Word Count:** 6508 words  
53  
54  
55  
56  
57  
58  
59  
60

1  
2  
3 24 **Abstract**  
4

5 25 *Introduction:* Case management (CM) in a primary care setting is a promising approach to integrating  
6  
7 26 and improving health care services and outcomes for patients with chronic conditions and complex care  
8  
9  
10 27 needs who frequently use healthcare services. Despite evidence supporting CM and interest in  
11  
12 28 implementing it in Canada, little is known about how to do this. This research aims to identify the  
13  
14 29 barriers and facilitators to the implementation of a CM intervention in different primary care contexts  
15  
16 30 (objective 1) and to explain the influence of the clinical context on the degree of implementation  
17  
18 31 (objective 2) and on the outcomes of the intervention (objective 3).  
19  
20  
21 32

22  
23 33 *Methods and analysis:* A multiple-case embedded mixed methods study will be conducted on CM  
24  
25 34 implemented in ten primary care clinics across five Canadian provinces. Each clinic will represent a sub-  
26  
27 35 unit of analysis, detailed through a case history. Cases will be compared and contrasted using multiple  
28  
29 36 analytical approaches. Qualitative data (objectives 1 and 2) from individual semi-structured interviews  
30  
31 37 (N=130), focus group discussions (N=20) and participant observation of each clinic (36 hours) will be  
32  
33 38 compared and integrated with quantitative (objective 3) clinical data on services use (N=300) and  
34  
35 39 patient questionnaires (N=300). An evaluation of intervention fidelity will be integrated into the data  
36  
37 40 analysis.  
38  
39  
40  
41  
42

43 42 *Ethics and dissemination:* This project received approval from the CIUSSS de l'Estrie – CHUS Research  
44  
45 43 Ethic Board (project number MP-31-2019-2830). To our knowledge, this is the first study to analyze the  
46  
47 44 implementation of CM in Canadian primary care settings. Results will provide the opportunity to refine  
48  
49 45 the CM intervention and to facilitate effective evaluation, replication and scale-up. This research  
50  
51 46 provides knowledge on how to respond to the needs of individuals with chronic conditions and complex  
52  
53  
54  
55  
56  
57  
58  
59  
60

1  
2  
3 47 care needs in a cost-effective way that improves patient reported outcomes and health care use, while  
4  
5 48 ensuring care team well-being.  
6  
7  
8 49

9

## 10 50 **Keywords**

11  
12 51 Primary health care; case management; chronic illness; complex care needs; frequent users;  
13  
14 52 implementation; evaluation; context, intervention fidelity.  
15  
16  
17 53

## 18 54 **Article Summary**

### 19 55 *Strength and limitations of this study*

- 20  
21  
22  
23 56
- 24 • This protocol details the steps for the implementation of a case management (CM) intervention  
25 for frequent users of health services with chronic conditions and complex care needs.  
26 57  
27  
28 58
  - 29  
30 59 • A novel conceptual model for CM implementation is proposed based on the integrative  
31 functions of primary care and the effective implementation of health care interventions.  
32 60  
33  
34 61
  - 35  
36 62 • The barriers and facilitators to implementing CM will be detailed and the influence of the clinical  
37 context on the degree of implementation and on the outcomes of the intervention will be  
38 evaluated.  
39 63  
40  
41 64
  - 42  
43 65
  - 44 66 • While the proposed conceptual model does not cover every possible construct for effective  
45 implementation, an inductive approach to data analysis will be used to allow for emergent  
46 themes and all stakeholders will participate in data analysis in order to ensure validity.  
47 67  
48  
49 68  
50  
51 69

## 52 53 54 70 **Introduction**

1  
2  
3 71 A priority for primary care research and the Canadian health care system is to address the complex  
4  
5 72 needs of patients who frequently use health care services (1, 2). These patients may suffer from a  
6  
7 73 combination of chronic illnesses, mental illness and/or socioeconomic vulnerabilities (3-5). Patients with  
8  
9  
10 74 chronic illnesses typically have a wide range of needs that require them to adopt new behaviours, such  
11  
12 75 as meeting with care providers on a regular basis, adhering to treatment plans, monitoring their  
13  
14 76 symptoms and making important decisions while also changing aspects of their lifestyle to preserve their  
15  
16 77 physical, psychological and social well-being (6-8). Far from “misusing” the health care system, studies  
17  
18 78 show that frequent users do so in an attempt to address unmet needs for health care and social services  
19  
20 79 (3, 9). Studies suggest that these attempts are often unsuccessful and result in repetitive use of services  
21  
22 80 in an uncoordinated way through frequent hospitalizations or visits to the emergency department (10,  
23  
24 81 11). This leads to negative experiences for both the care providers and for the patients, poor health  
25  
26 82 indicators and high mortality rates for the patients and considerable costs to the health care system (11-  
27  
28 83 13). Several countries have therefore experimented with new models of health care delivery that can  
29  
30 84 achieve better coordination and integration of services, some of which have been found to reduce  
31  
32 85 fragmentation and improve care continuity (14). Early examples of such models include the Chronic Care  
33  
34 86 Model (CCM) (15) and the Innovative Care for Chronic Conditions framework (16). These models  
35  
36 87 emphasize the importance of providing support to patients for self-management and decision-making,  
37  
38 88 seeking innovative approaches within available clinical information systems and proposing ways to  
39  
40 89 redesign the delivery of health care (14).  
41  
42  
43  
44  
45  
46  
47

48 91 Individuals with chronic illnesses require organized care and close follow-up delivered over an extended  
49  
50 92 period of time (17). The primary care setting is the most suitable for supporting individuals with chronic  
51  
52 93 illnesses due to its defining features of patient-centered first contact, continuous, comprehensive, and  
53  
54 94 coordinated care (17, 18). Health systems built on the principles of primary care achieve better health  
55  
56  
57  
58  
59  
60

1  
2  
3 95 outcomes and greater equity, at a lower cost (19) than systems with a specialty care orientation (18).  
4  
5 96 Integrated care may be achieved in a primary care setting through the creation of inter-sectorial linkages  
6  
7 97 between health and social policies, i.e. the linking of health care to other human service systems (eg.  
8  
9 98 long-term care, education, vocational and housing services) in order to improve clinical outcomes,  
10  
11 99 patient and provider satisfaction and efficiency (14, 18, 20).  
12  
13  
14  
15

100

### 101 **Case management**

102 Case management (CM) in a primary care setting is one approach that has been shown to increase the  
103 integration of health services (21, 22) and to improve care and outcomes for patients with chronic  
104 conditions and complex needs who frequently use health care services (23, 24). Defined as “a  
105 collaborative, client-driven process for the provision of quality health and support services through the  
106 effective and efficient use of resources” (25), CM is among the best models available to mitigate the  
107 high utilization of the health care system and associated costs (23, 26). An adaptive randomized trial of  
108 CM interventions targeting frequent users of health services demonstrated that appropriate patient  
109 identification, staff training and centralized intervention delivery are components of CM that can be  
110 successfully implemented on a large scale and lead to a decrease in health consumption (27). A recent  
111 systematic review (10) identified the most common components of CM interventions for chronically ill  
112 patients including the integration of services between hospitals and home or other facilities, regular  
113 home visits, regular telephone calls, individual assessment and care planning, education and self-  
114 management support, psychosocial support, and ongoing supervision and assessment. The same study  
115 found that a reduction in hospital admission rates was reported after implementation of CM  
116 interventions (10). A systematic review of literature on the characteristics of CM interventions in  
117 primary care reporting positive outcomes for frequent users of health care revealed three essential  
118 requisites for success. First, the intervention must identify and target patients with the greatest needs,



1  
2  
3 119 and who are therefore most likely to benefit from the intervention. Second, the intervention must be  
4  
5 120 delivered with sufficient intensity (i.e. frequently enough or with a high enough dose) to produce the  
6  
7 121 desired effect. Third, an interdisciplinary approach to care planning is preferred, where a variety of  
8  
9  
10 122 professionals from both care and cure sectors actively participate in the intervention (28).

11  
12 123  
13  
14 124 Despite the evidence base supporting CM as an intervention for frequent users, little evidence exists  
15  
16 125 about the facilitators and barriers to CM implementation (29). Although there is a strong interest in  
17  
18 126 implementing CM in the Canadian primary care setting, little information is available on how to do this.  
19  
20  
21 127 CM has rarely been implemented and documented systematically in order to identify and replicate best  
22  
23 128 practices. This protocol is part of a larger research program on CM in primary care for frequent users of  
24  
25 129 healthcare services with chronic diseases and complex care needs (2) and details the steps for the  
26  
27 130 implementation analysis that was not described in the original protocol of the whole program.

28  
29  
30 131

### 31 32 132 **Objectives**

- 33  
34 133 1) To identify the barriers and the facilitators to implementation of the CM intervention in different  
35  
36 134 primary care contexts.  
37  
38 135 2) To explain the influence of the clinical context on the degree of implementation.  
39  
40 136 3) To evaluate the influence of the context of implementation on the outcomes of the intervention.  
41  
42

43 137

### 44 45 138 **Methods/Design**

#### 46 47 139 *Conceptual model*

48  
49  
50 140 The conceptual model developed to guide this research protocol was informed by two multi-level  
51  
52 141 conceptual frameworks in order to analyze the effective implementation of an integrative primary care  
53  
54 142 intervention. Multi-level frameworks represent the interacting layers of phenomena inherent to  
55  
56  
57  
58  
59  
60

1  
2  
3 143 organizations and are commonly used to develop theories, measure and analyze phenomena while  
4  
5 144 accounting for the complexity inherent to these systems (30, 31). Multi-level interventions mobilize  
6  
7 145 resources and facilitate linkages across organizations “to solve coordination problems and adapt to  
8  
9 146 change” (31).  
10  
11  
12 147

13  
14 148 The first framework used to guide this research protocol is the Valentijn et al. framework for integrated  
15  
16 149 care based on the integrative functions of primary care (18). The concept of integration originates from  
17  
18 150 organizational theory and refers to “the quality of the state of collaboration” that may exist among the  
19  
20 151 multiple levels of service delivery with the purpose of achieving a required mutual effort and agreement  
21  
22 152 (14). Integrated health care interventions are a means to improve access, quality and continuity of  
23  
24 153 services in a more efficient way, especially for people with complex needs (18) . This framework  
25  
26 154 describes the central role of primary care in integrating the multiple levels of health care: system  
27  
28 155 integration at the macro level; organizational and professional integration at the meso level; clinical  
29  
30 156 integration at the micro level; and functional and normative integration to link the macro, meso and  
31  
32 157 micro levels (18). Valentijn et al.’s framework is intended for analyzing and testing the causal  
33  
34 158 relationships within and between the integration levels, which interact to varying degrees depending on  
35  
36 159 the specific context of health care delivery (18). This framework is therefore suitable for studying the  
37  
38 160 different primary care contexts of the CM intervention from the perspective of integrated care and is  
39  
40 161 the unifying thread to the implementation and evaluation of the CM intervention.  
41  
42  
43  
44  
45  
46 162

47  
48 163 The second framework used to guide this research protocol is the Consolidated Framework for  
49  
50 164 Implementation Research (CFIR), intended to promote effective implementation and formative  
51  
52 165 evaluation of complex, multi-level interventions in health care (32). The CFIR provides a taxonomy of  
53  
54 166 constructs that can be used to understand, measure and assess implementation across a variety of  
55  
56  
57  
58  
59  
60

1  
2  
3 167 contexts. The constructs are categorized into five major domains that similar to the Valentijn et al.  
4  
5 168 (2013) framework, reflect a multilevel perspective. The *outer setting* refers to the economic, political  
6  
7 169 and social context in which the implementing organization is situated and corresponds to the macro  
8  
9  
10 170 level. The *inner setting* corresponds to the meso level of the organizational context and includes  
11  
12 171 constructs such as the structure and culture of the implementing organization. At the micro level, the  
13  
14 172 *individuals* involved in the intervention are described. The CFIR includes two additional domains: the  
15  
16 173 *characteristics of the intervention*, a description of its core components, and the *implementation*  
17  
18 174 *process*, considered a dynamic, non-sequential and non-linear domain that can stem from any level,  
19  
20  
21 175 macro, meso or micro (32). When understood, process provides insight that links the various levels of  
22  
23 176 analysis and shed light on the causal or generative mechanisms underlying the intervention being  
24  
25 177 studied (32, 33). Barriers and facilitators may arise at multiple levels of intervention delivery, as external  
26  
27  
28 178 influencers, organizational or professional components or during the process by which an intervention is  
29  
30 179 adopted within an organization (32).

31  
32 180  
33  
34 181 The conceptual model developed to guide this research protocol is presented in Figure 1. On the left  
35  
36 182 side of the figure are the core components of the CM intervention, described in the proceeding section.  
37  
38  
39 183 During implementation, the intervention takes on unique properties and characteristics related to the  
40  
41 184 local context in which it is introduced (referred to in Figure 1 as the *context of implementation*) (32). The  
42  
43 185 context of implementation includes macro, meso and micro level determinants, depicted by the  
44  
45 186 concentric circles in the middle of the figure. The process of implementation is represented by the arrow  
46  
47  
48 187 at the bottom of the figure, which represents the dynamic and continuous nature of intervention  
49  
50 188 implementation. Finally, to the right, are the final expected outcomes of the intervention, based on the  
51  
52 189 quadruple aims to optimize health system performance: improved patient outcomes, health care use,  
53  
54  
55 190 care team well-being and cost effectiveness (34).

1  
2  
3 191  
4  
5 192 Constructs were selected from both Valentijn et al. (2013) and Damschroder et al. (2009) to reflect the  
6  
7 193 objectives of this research. The characteristics of the intervention after implementation in a particular  
8  
9 194 local context will be analyzed based on the intervention's *adaptability* to meet local needs, its *relative*  
10  
11 195 *advantage* to the context, and its *complexity* or difficulty of implementation. At the macro level, how  
12  
13 196 the intervention contributes to *system integration* will be examined, including vertical integration and  
14  
15 197 collaboration across care sectors and horizontal integration through a holistic view of the patient (18).  
16  
17 198 This construct reflects the implementing organization's knowledge of the needs of its patient population  
18  
19 199 and its ability to respond with appropriate structures, techniques and resources (*patient needs and*  
20  
21 200 *resources*) (32). The organization's degree of networking with external services and structures  
22  
23 201 (*cosmopolitanism*) will be examined, as well as its formal strategies and policies supporting external  
24  
25 202 linkages (*external policies and incentives*).  
26  
27  
28  
29

30 203  
31  
32 204 At the meso level, *organizational* and *professional integration* will be examined, which refer to the  
33  
34 205 partnerships between services and professionals within the implementing organization. The *structural*  
35  
36 206 *characteristics* of the organization and the *implementation climate* will be described. At the micro level,  
37  
38 207 interest will shift to *clinical integration*, which reflects the level of coordination and coherence of the  
39  
40 208 primary care delivery process (18). The *knowledge and beliefs* of the various professionals involved in  
41  
42 209 the intervention will be examined, as well as their perceived *self-efficacy* to implement CM, and their  
43  
44 210 *individual stage of change*, which refers to their progress towards full adoption and sustained use of the  
45  
46 211 intervention (32).  
47  
48  
49

50 212  
51  
52 213 Finally, the process of implementation will be analyzed by examining how the CM intervention was  
53  
54 214 planned and executed at the local level, how professionals were mobilized and engaged for participation  
55  
56  
57  
58  
59  
60

1  
2  
3 215 in the intervention, and by examining the mechanisms put in place to discuss and provide feedback  
4  
5 216 about the experience, progress and quality of implementation (*planning/executing; engaging;*  
6  
7 217 *reflecting/evaluating*). These constructs reflect the level of *functional* and *normative integration*  
8  
9  
10 218 resulting from the implementation of the intervention: how the implementing organization mobilized  
11  
12 219 management functions in support of the intervention, as well as the degree of development of a shared  
13  
14 220 goal or mission among participating individuals and partner organizations for the implementation of the  
15  
16 221 intervention (18).  
17  
18

19 222

20  
21 223 *The intervention*

22  
23 224 An intervention was designed to reflect the standards of practice of the National Case Management of  
24  
25 225 Canada as well as the Case management society of America (25, 35). The activities of the intervention  
26  
27 226 follow the Canadian Institutes for Health Research (CIHR) Strategy for Patient Oriented research and  
28  
29 227 incorporate the integration characteristics of the National Collaboration for Integrated Care and Support  
30  
31 228 (36, 37). Patients with chronic conditions most often seek and receive comprehensive care in a primary  
32  
33 229 care setting (38) and the leadership of a case manager who is experienced in primary care has been  
34  
35 230 shown to facilitate the successful implementation of chronic care models (39). The CM intervention is  
36  
37 231 therefore designed to be delivered by a primary care health professional in a primary care clinical setting  
38  
39 232 over a period of 12 months.  
40  
41  
42

43 233

44  
45 234 In consideration of these guidelines and of the results of previously cited studies (10, 11, 23, 27, 28), an  
46  
47 235 intervention was designed comprised of four main components: 1) evaluation of patient needs and  
48  
49 236 preferences; 2) co-development and maintenance of a patient-centered individualized services plan; 3)  
50  
51 237 coordination of services among all partners; and 4) education and self-management support for patients  
52  
53 238 and families.  
54  
55  
56  
57  
58  
59  
60

239

240 1. Evaluation of patient needs and preferences

241 The identification of patients who are in need of intervention and who stand to benefit the most from  
242 CM is an essential first step (27, 28), ideally executed by an interdisciplinary team (5, 40). Patients are  
243 identified by searching administrative data or clinical records in addition to their referral for the CM  
244 intervention by primary care professionals. This approach combines clinician judgement with objective  
245 data from electronic medical record (EMR) or administrative databases (2, 41). The CM intervention  
246 targets patients who present with at least one chronic illness, including mental illness, who frequently  
247 use health services as determined by 4 or more emergency department visits or hospitalizations in the  
248 previous 12 months, and who have complex needs as determined by the care team. Once a patient has  
249 been identified for inclusion in the CM intervention, the case manager examines the patient's medical  
250 records going back 12 months in order to understand the reasons for the frequent use of services. The  
251 case manager identifies the patient's physical and/or mental illnesses as well as social challenges such as  
252 insecure housing or employment, poverty, violence, substance use disorders, etc. The case manager also  
253 documents the health and social services previously provided to the patient, as well as the names, roles  
254 and contact information of professionals currently involved with the patient or who may eventually be  
255 called upon to participate in the care of the patient.

256

257 The case manager validates with the patient the information collected from the medical records and  
258 determines the patient's personal needs and preferences for future services and resources. This step  
259 constitutes the first in-depth interaction between the case manager and the patient, and is essential for  
260 building mutual trust and respect (21), for establishing a patient-centered care process, and for  
261 encouraging the commitment of the patient as a partner in the care process (42, 43). The patient may  
262 prefer to be accompanied by a caregiver or advocate with lived experience of the patient's health

1  
2  
3 263 situation who can assist in navigating the health and social services system (44). When referring to “the  
4  
5 264 patient” in this article, we also refer to an individual who may stand in for the patient at any point  
6  
7 265 during the intervention. Finally, the case manager seeks the patient’s consent to communicate with  
8  
9  
10 266 potential care professionals throughout the intervention and ensures that the patient understands and  
11  
12 267 agrees to the next step of the intervention: the creation of an Individualized Services Plan (ISP). The ISP  
13  
14 268 is a tool for planning and coordinating tailored services intended to give meaning and direction to the  
15  
16 269 patient in consideration of his or her life goals (45), personal environment, resources and culture, in  
17  
18 270 collaboration with a multidisciplinary team of professionals (46) and health and social services  
19  
20  
21 271 organizations.  
22

272

## 273 2. Co-development and maintenance of a patient-centered ISP

274 The ISP for patients with chronic conditions may lead to improvements in physical and psychological  
275 health, as well as in their ability to self-manage their condition (46-48). It is among the most commonly  
276 used strategies in CM interventions (10, 11). The case manager identifies resources available in the local  
277 health and social services network and within the community that may be appropriate for the patient.  
278 This involves a holistic analysis of the patient’s situation and the identification of clinical-administrative  
279 issues and a final list of care professionals that will be invited to examine the patient’s situation. These  
280 may be health care and social services professionals, managers or representatives of community  
281 organizations. The case manager communicates directly with targeted care professionals to request  
282 their involvement, to ensure that the reason for the intervention is understood and to agree upon a  
283 mutually convenient date, time and place for an ISP meeting with the patient. The case manager  
284 prepares the agenda for the ISP meeting and communicates with the patient to reconfirm consent  
285 regarding the professionals who will participate in the meeting and to maintain a relationship of trust

1  
2  
3 286 and transparency with the patient. The ISP meeting is ideally held in-person, but may be done by phone  
4  
5 287 or online.  
6

7 288  
8  
9  
10 289 At the beginning of the ISP meeting, the care team reviews the potential resources and services that  
11  
12 290 may be proposed to the patient prior to the patient's arrival. This allows the care team to collaboratively  
13  
14 291 examine the patient's situation, needs and preferences and to mobilize their multidisciplinary  
15  
16 292 perspectives (46). The ISP is then developed with the patient and their advocate upon their arrival. The  
17  
18 293 ISP includes a maximum of 3 or 4 objectives in line with the patient's overall expectations and life  
19  
20 294 project (49). The group proposes preferred methods of communication and strategies for exchanging  
21  
22 295 information for the duration of the intervention. The case manager writes up the ISP in plain language  
23  
24 296 and validates that the patient understands and agrees to it.  
25  
26  
27

28 297

29  
30 298 3. Coordination of services among all partners  
31

32 299 Patients with chronic illnesses and complex care needs are often cared for by multiple providers in  
33  
34 300 various locations and experience difficulty navigating the health system and other resources resulting  
35  
36 301 in unmet needs, a lower quality of life and higher mortality rates (48). A coordinated response by care  
37  
38 302 providers that promotes patient empowerment over an extended period of time is recommended (14).  
39  
40 303 In this intervention, the case manager transmits a copy of the written ISP to the patient and the care  
41  
42 304 team and follows-up regularly with the patient's primary care providers in the clinical setting, ensuring  
43  
44 305 active engagement and direct communication. As the principal contact-person and advocate for the  
45  
46 306 patient, the case manager establishes contact with the services or resources identified in the ISP,  
47  
48 307 providing a personalized reference for the patient, explaining the case and informing care professionals  
49  
50 308 of past and potential challenges facing the patient.  
51  
52  
53

54 309  
55  
56  
57  
58  
59  
60



1  
2  
3 310 Regular communication and follow-up encourages the patient's active engagement in the intervention,  
4  
5 311 a strategy that has been shown to reduce future use of emergency services (26, 50, 51). The case  
6  
7 312 manager talks to the patient about their preferred method for reaching the case manager and other  
8  
9  
10 313 relevant services. Adherence to the ISP throughout the intervention is ensured by maintaining contact  
11  
12 314 with the care professionals involved with each patient, and by verifying if the patient's goals have been  
13  
14 315 attained. The ISP should be reviewed at least once every 3 months. If the patient desires a change in  
15  
16 316 their ISP, or if a care professional identifies any issues throughout the intervention, the case manager  
17  
18 317 reassesses the situation with the patient and adjusts the ISP as necessary.  
19  
20

21 318

#### 23 319 4. Education and self-management support for patients and families

25 320 Self-management support was found to be the strategy most frequently associated with health  
26  
27 321 improvements in patients with chronic diseases in a primary care setting (17). Education and self-  
28  
29 322 management support activities aim to increase the patient's skills, confidence and motivation to control  
30  
31 323 and manage their symptoms and to follow their ISP with structured support for problem solving and  
32  
33 324 continuous assessment of the patient's objectives and progress (52). This component of the intervention  
34  
35 325 is considered an ongoing and transversal process to be performed as needed throughout the  
36  
37 326 intervention.  
38  
39

40 327

43 328 Case managers aim to develop the patient's ability to monitor their condition, take appropriate action  
44  
45 329 and identify when and how to ask for professional help by assessing the patient's knowledge and  
46  
47 330 learning needs and suggesting beneficial activities, such as journaling symptoms and vitals, and  
48  
49 331 informational resources based on the patient's unique situation. Case managers are trained in  
50  
51 332 motivational interviewing, a "client-centered, directive communication method aimed at changing  
52  
53 333 behavior" (53). The case manager supports the patient to set realistic goals through a "smart" action  
54  
55  
56  
57  
58  
59

1  
2  
3 334 plan that includes specific behavioral goals that are measurable and attractive to the patient, that may  
4  
5 335 be accomplished in a realistic time frame and that build on previous positive experiences. The case  
6  
7 336 manager helps the patient prepare for meetings with the various care professionals to ensure that the  
8  
9  
10 337 patient is empowered to communicate his or her goals and to receive the desired care. Patients are  
11  
12 338 coached on how to effectively communicate with their relatives, to establish expectations, and to  
13  
14 339 ensure a successful care partnership.

#### 16 340 *Study setting*

18  
19 341 The CM intervention will be implemented in ten primary care clinics, each representing a unique case.  
20  
21 342 Two clinics were selected from each of the five participating Canadian provinces of Newfoundland, Nova  
22  
23 343 Scotia, New Brunswick, Québec and Saskatchewan using a purposeful sampling strategy (54). Clinics  
24  
25 344 were selected that had not previously implemented CM and that were interested in implementing the  
26  
27 345 CM intervention and participating in the research project. The interest of a health care professional, a  
28  
29 346 nurse or a social worker, to develop the role of the case manager and to be available to dedicate  
30  
31 347 approximately 1 day per week to the study was essential. The case manager was required to have  
32  
33 348 primary care experience and was offered training in the intervention and continuous support and  
34  
35 349 follow-up through the establishment of a community of practice.  
36  
37  
38  
39  
40

#### 41 351 *Patient and public involvement*

42  
43 352 Patient partners were involved in this research since its inception, including the design of the research  
44  
45 353 questions and the development of this protocol of which they are coauthors (VS and MW). They  
46  
47 354 continue to provide their expertise regarding study feasibility and acceptability. They will be involved in  
48  
49 355 the interpretation of data and in the dissemination of results.  
50  
51  
52  
53

54 356

#### 55 357 *Timeline*

1  
2  
3 358 The implementation of the CM intervention will take place over a period of one year. A cohort of  
4  
5 359 patients will be recruited at each clinic and will be administered the intervention over the course of 12  
6  
7 360 months.  
8  
9

10 361

### 11 362 *Patient recruitment*

12 363 Each clinic will identify 30 patients for enrolment in the CM intervention, for a total of 300 patients  
13  
14 364 across the 5 participating provinces. Patients are selected who are most likely to benefit from CM, based  
15  
16 365 on the clinical judgement of the case manager and the family physician. Criteria for inclusion in the  
17  
18 366 study are as follows: 1) living with at least one chronic physical or mental illness; 2) frequent user of  
19  
20 367 health care services ie. having 4 or more hospitalizations or visits to the emergency department in the  
21  
22 368 previous year; 3) having complex care needs as determined by the care team. Patients who are ineligible  
23  
24 369 for participation in the study include individuals whose prognosis is less than one year or who are  
25  
26 370 exhibiting a loss of autonomy.  
27  
28  
29

30 371

### 31 372 *Study design*

32 373 The implementation analysis is designed as a multiple-case embedded study, where each of the ten  
33  
34 374 clinics will represent one sub-unit of analysis. This design is best-suited to analyzing complex  
35  
36 375 interventions implemented in variable and dynamic settings, and where the underlying context is  
37  
38 376 difficult to isolate from the intervention itself (55). This design allows several levels of analysis, the  
39  
40 377 observation of various organizational processes or behaviours, the examination of the context and  
41  
42 378 process of implementation, and the interaction among involved stakeholders (56). It also favors the use  
43  
44 379 of mixed methods of data collection and analysis (57).  
45  
46  
47  
48  
49

50 380

### 51 381 *Data collection*

1  
2  
3 382 To accomplish the objectives of this research, a mixed methods data collection is planned. Multiple  
4  
5 383 sources of information will be used to collect both qualitative and quantitative data.  
6  
7  
8 384

9  
10 385 **Individual semi-structured interviews** will be administered to all case managers (1-2 per clinic) and  
11  
12 386 clinic managers (1 per clinic) at each study site at the start of the intervention (T0), and at the end of the  
13  
14 387 intervention (T12 months). At the end of the intervention (T12 months), 10 patients and/or their  
15  
16 388 representative will also be interviewed. Patients will be purposefully selected to achieve maximum  
17  
18 389 variation (54). A total of 130 individual semi-structured interviews will be administered across the 10  
19  
20 390 participating clinical sites. An interview guide was developed composed of 18 open-ended questions  
21  
22 391 based on the constructs of the conceptual model (Figure 1). The first part of the interview will address  
23  
24 392 the clinical context of the CM intervention, the services offered at each clinical site to patients with  
25  
26 393 chronic conditions and complex care needs, and the way in which the clinic works with other health and  
27  
28 394 social services organizations. In the second part of the interview, questions will be asked about the  
29  
30 395 implementation of the four components CM intervention, the context of implementation, the barriers  
31  
32 396 and facilitators to intervention, and about individual perceptions and attitudes towards the intervention.  
33  
34  
35  
36  
37  
38

### 39 **Focus groups**

40  
41 399 A focus group discussion will be held at each participating clinic, once at the beginning of the  
42  
43 400 intervention (T0) and once at T9-12 months, for a total of 20 focus groups throughout the CM  
44  
45 401 intervention. Primary care providers, including physicians, nurses, social workers, pharmacists and any  
46  
47 402 health and social services professionals involved in the intervention will be invited to take part in a  
48  
49 403 discussion facilitated by a member of the PriCare research team. The interview guide described above  
50  
51 404 for the semi-structured interviews will be adapted and used to guide the focus group discussion.  
52  
53  
54  
55  
56  
57  
58  
59  
60

1  
2  
3 406 **Non-participant observation**  
4

5 407 The activities of the intervention at each of the ten clinical sites will be observed for thirty-six hours  
6  
7 408 during the implementation year. A member of the PriCare research team will observe the CM activities  
8  
9  
10 409 including the meetings between the patient and the case manager, the development of the ISP,  
11  
12 410 meetings between the primary care professionals, and any other activities adopted by the clinic under  
13  
14 411 observation. Data collection will be guided by means of an observation grid developed to reflect the four  
15  
16 412 components of the CM intervention and the constructs of the conceptual framework.  
17  
18

19 413

20  
21 414 **Clinical data on services use**  
22

23 415 Quantitative data from patient medical records will be collected at the beginning (T0) of the  
24  
25 416 intervention for a period of 12 months, before the patient's first visit with the case manager, and at the  
26  
27 417 end of the intervention 12 months) (N=300). The purpose of this data collection is to compare the  
28  
29 418 utilization of services in the year before the intervention with utilization during the intervention. Data  
30  
31 419 will include the number of emergency department visits, overnight stays in the hospital and primary  
32  
33 420 care professional visits. Patient expenditures from these activities will be calculated using an established  
34  
35 421 fee schedule from the Canadian Institute of Health Information (CIHI) patient cost estimator (58). The  
36  
37 422 cost of the intervention will be measured by tracking expenditures related to the CM activities.  
38  
39

40 423

41  
42  
43 424 **Patient self-administered questionnaires**  
44

45 425 Participating patients (N=300) will be asked to complete a 30-minute questionnaire at baseline (T0), at  
46  
47 426 the halfway point (T6 months) and at the end of the intervention (T12 months) under the guidance of a  
48  
49 427 member of the PriCare research team. Questionnaires are available in both English and French and have  
50  
51 428 been validated. Data collected will include age, gender, marital status, education, occupation, economic  
52  
53 429 status with family income and patient perception of his or her economic situation, health literacy,  
54  
55  
56  
57  
58  
59  
60

1  
2  
3 430 multimorbidity, care integration, self-management and quality of life. Health literacy will be measured  
4  
5 431 using Chew's 3 questions for screening patients with inadequate or marginal health literacy (59, 60),  
6  
7 432 multimorbidity with the Disease Burden Morbidity Assessment (21 items) (61, 62), care integration with  
8  
9 433 the Picker Institute Questionnaire (13 items) (63), self-management with the Partners in Health Scale (12  
10  
11 434 items) (64, 65), quality of life with the SF-12v2 (12 items) (66) , quality-adjusted life years (QALY) derived  
12  
13 435 from the SF-12v2 (67) and psychological distress with Kesslers' 6 questions regarding a person's  
14  
15 436 emotional state (68).  
16  
17  
18  
19 437

### 21 438 **Intervention fidelity evaluation**

23 439 The degree to which an intervention is delivered as intended is critical to the attainment of expected  
24  
25 440 outcomes (69, 70). Referred to as intervention fidelity, the delivery and the degree of adherence to the  
26  
27 441 four main components of the intervention will be assessed based on the qualitative and quantitative  
28  
29 442 data collected by a member of the PriCare research team during the intervention year. A fidelity grid  
30  
31 443 was developed using the Carroll et al. (2007) conceptual framework for implementation fidelity (71). In  
32  
33 444 addition to identifying the essential components of the intervention as described previously, adherence  
34  
35 445 to the content, frequency, duration and coverage of the intervention as described in this protocol, as  
36  
37 446 well as the moderating factors that may influence implementation such as intervention complexity, the  
38  
39 447 facilitation strategies used, the quality of intervention delivery, and the responsiveness of participants  
40  
41 448 will be documented (71). The fidelity grid guides the data collection via a series of general questions  
42  
43 449 referring to each element of (71) conceptual framework, identifies primary and secondary sources of  
44  
45 450 data and specifies the data collection method for each element of the conceptual framework.  
46  
47  
48  
49  
50 451

### 52 452 *Outcome variables*

1  
2  
3 453 As described in the conceptual model (Figure 1), the main outcomes of the intervention that will be  
4  
5 454 examined are based on the quadruple aims to optimize health system performance: *improved patient-*  
6  
7 455 *reported outcomes, health care use, cost effectiveness and care team well-being* (34). Self-management  
8  
9 456 and quality of life are the main patient-reported outcomes collected from the patient-administered  
10  
11 457 questionnaire at baseline and at the end of the intervention (T12 months). Health care use will be based  
12  
13 458 on the clinical data collected on services use including the number of emergency department visits,  
14  
15 459 overnight hospital stays and primary care professional visits. It will also be based on health services  
16  
17 460 integration, assessed within the patient-administered questionnaire. Care team well-being will be  
18  
19 461 evaluated from the data collected from the individual semi-structured interviews and focus group  
20  
21 462 discussions with health care professionals. Finally, cost effectiveness will be based on the CIHI cost  
22  
23 463 estimator, as previously described.  
24  
25  
26  
27  
28  
29

### 30 465 *Analysis*

31  
32 466 A combination of analytical strategies will be used to reflect the variability and dynamic nature of  
33  
34 467 context analysis and the mixed methods approach as used in this research (55, 57, 72). First, qualitative  
35  
36 468 and quantitative data collected will be integrated through a comparison of results for similarities and  
37  
38 469 differences throughout the analysis phase (72). Second, qualitative and quantitative data will be  
39  
40 470 compared for variables measured in several ways such as health services utilization, self-management,  
41  
42 471 quality of life and care integration (73). Third, qualitative and quantitative data will be merged for each  
43  
44 472 of the 10 cases (the participating clinical sites). A case history will be reported for each clinical site that  
45  
46 473 will constitute the synthesis of the merged data. Fourth, a comparison of the cases will be completed  
47  
48 474 using a mixed methods matrix (54). All categories of stakeholders involved in this research including the  
49  
50 475 principal investigators, research assistants, patient partners, clinical experts, technical and scientific  
51  
52 476 experts and policy makers, will be called upon to participate in the data analysis to ensure valid and  
53  
54  
55  
56  
57  
58  
59  
60

1  
2  
3 477 meaningful interpretations. Additional analytical techniques for case study research (55) will be used as  
4  
5 478 detailed below.  
6

7  
8 479

9  
10 480 Objective 1

11  
12 481 To identify the barriers and the facilitators to implementation of the CM intervention in different  
13  
14 482 primary care contexts, the qualitative data collected using individual semi-structured interviews, focus  
15  
16 483 groups and non-participant observation will be analyzed. Responses to questions regarding the  
17  
18 484 perceived barriers and facilitators to responding to the needs of patients with chronic conditions and  
19  
20 485 complex care needs, to working with internal clinic partners and external health and social services  
21  
22 486 partners to care for this patient population, and to the process of implementing the four main  
23  
24 487 components of the CM intervention will be extracted and analyzed. Information regarding the perceived  
25  
26 488 complexity of the intervention, ease of implementation, care professional engagement and satisfaction  
27  
28 489 with the intervention, and available support strategies to facilitate implementation will be extracted  
29  
30 490 from the data collection grid used for the non-participant observation and for the fidelity evaluation.  
31  
32  
33

34 491

35  
36  
37 492 Objective 2

38  
39 493 A similar approach will be taken to explain the influence of the context of implementation on the degree  
40  
41 494 of implementation. Interviewees and participants in the focus group discussions will be asked specific  
42  
43 495 questions regarding the local clinical context, the workplace environment, relationships with external  
44  
45 496 health and social services partners, individual attitudes and perceptions to the intervention and the  
46  
47 497 overall process of implementation of the CM intervention. This information will be extracted and  
48  
49 498 compared to the results of the fidelity evaluation to assess the degree of implementation of the  
50  
51 499 intervention.  
52  
53

54  
55 500  
56  
57  
58  
59  
60



1  
2  
3 501 A mixed thematic analysis approach will be used (54). Each of the ten clinical sites will be analyzed  
4  
5 502 separately as an individual case study using a deductive approach based on the conceptual model  
6  
7 503 (Figure 1), as well as an inductive approach based on emergent constructs. A case history will be  
8  
9  
10 504 reported, guided by the constructs of the conceptual model (Figure 1). Subsequent to individual analysis  
11  
12 505 of the ten cases, a comparison between the cases will be performed using a descriptive and  
13  
14 506 interpretative matrix (54). This approach allows systematic comparison among cases and among units of  
15  
16 507 analysis. Analytical techniques specific to case study research will be used as described in (55) including  
17  
18 508 pattern comparison, research of competing explanations and construction of explanations. Qualitative  
19  
20  
21 509 data will be managed using multisite NVivo 12 server software (QSR International Pty Ltd).  
22

23 510

### 25 511 Objective 3

27 512 To evaluate the influence of the context of implementation on the outcomes of the intervention, clinical  
28  
29  
30 513 data on services use and quantitative data extracted from the patient self-administered questionnaires  
31  
32 514 will be analyzed using descriptive statistics. Quantitative data will be analyzed first and then interpreted  
33  
34 515 in integration with qualitative data and the intervention fidelity evaluation described above, rather than  
35  
36 516 trying to calculate non-biased quantitative effects (73). Regression models will be developed to evaluate  
37  
38  
39 517 the relationships between intervention fidelity, patient characteristics, the constructs of the conceptual  
40  
41 518 model reflecting the contextual elements of the intervention, and the outcomes of the intervention. This  
42  
43 519 will be done using SPSS version 26. An incremental cost-effectiveness/utility ratio (ICER or ICUR) (74) will  
44  
45  
46 520 be calculated using data collected on costs and quality-adjusted life years (QALY) before and after  
47  
48 521 implementation of the CM intervention. Multivariate parametric analyses with bootstrap replications  
49  
50 522 will be conducted together with cost-effectiveness acceptability curves (CEAC) (75).  
51

52 523

### 54 524 **Discussion**

1  
2  
3 525 CM is a promising approach to delivering care to patients with chronic illnesses and complex care needs,  
4  
5 526 but little is known about its implementation in a primary care setting (21). As an intervention composed  
6  
7 527 of multiple components and steps that will be implemented in multiple sites, CM is an example of a  
8  
9 528 complex, context-dependent intervention (76). Identifying and analyzing the contextual determinants  
10  
11 529 across a variety of sites is necessary to understand how the intervention can produce its intended  
12  
13 530 outcomes (77). An implementation analysis achieves a deeper understanding of the conditions that are  
14  
15 531 most likely to lead to the successful implementation of the core components of the intervention (56). It  
16  
17 532 serves to identify variation in outcomes associated with different contexts and to identify  
18  
19 533 implementation problems (73). An implementation analysis can reveal how an intervention causes  
20  
21 534 change in a particular context and highlights an intervention's strengths and weaknesses in relation to  
22  
23 535 intended outcomes (56).  
24  
25  
26  
27

28 536  
29  
30 537 This research will detail the steps involved in implementing the four main components of the CM  
31  
32 538 intervention at different clinical sites and will identify barriers and facilitators to implementation,  
33  
34 539 providing the opportunity to address potential problems and to refine the intervention. This context of  
35  
36 540 implementation which will be further understood through a detailed, theoretically-based approach to  
37  
38 541 the identification and analysis of the macro, meso and micro level determinants of implementation (18,  
39  
40 542 32). The implementation process will be studied, highlighting the development and change across time  
41  
42 543 of the steps required to implement the intervention in various contexts. This research will respond to  
43  
44 544 some of the most important issues raised in recent publications on CM for frequent users of health care  
45  
46 545 services with chronic illnesses and complex care needs (21, 23, 24, 26) , by contributing to the  
47  
48 546 understanding of how to implement this intervention in different primary care contexts in a cost-  
49  
50 547 effective way that improves patient reported outcomes and health care use, while ensuring the well-  
51  
52 548 being of the care team.  
53  
54  
55  
56  
57  
58  
59  
60

1  
2  
3 549  
4  
5 550 The multi-level conceptual framework proposed in this study may be helpful for future research because  
6  
7 551 it combines the approach to analyzing the effective implementation of health care interventions, with  
8  
9 552 the principles of the integrative functions of primary care. The resulting framework supports the analysis  
10  
11 553 of effective implementation not only of CM, but also of primary care interventions aiming to achieve  
12  
13 554 care integration. The framework reflects the importance of intersectorial linkages and ensures the  
14  
15 555 incorporation of constructs aimed to improve access, quality and continuity of services for patients with  
16  
17 556 complex needs (18), regardless of the intervention being implemented. It is also particularly suited to  
18  
19 557 the analysis and formative evaluation of complex, multi-level interventions in health care, verifying what  
20  
21 558 works where and why across multiple contexts (32). The conceptual framework represents how patient,  
22  
23 559 organizational and systems-level elements of implementation, the dynamic, time-dependent process of  
24  
25 560 implementation, and the defining features of primary care, can translate into meaningful intervention  
26  
27 561 outcomes, based on the quadruple aims to optimize health system performance. The framework can  
28  
29 562 inform the effective implementation of complex primary care interventions that seek to facilitate the  
30  
31 563 continuous, comprehensive and coordinated delivery of services to individuals or populations, and that  
32  
33 564 necessitate the engagement of multiple stakeholders across various sectors.  
34  
35  
36  
37  
38  
39  
40

41 566 The use of “multi-strategy” or “multi-faceted” frameworks to describe and analyze the implementation  
42  
43 567 of complex interventions increases the precision and specificity of reporting, which facilitates effective  
44  
45 568 evaluation and replication (78, 79). The proposed research fulfills an essential step towards replication  
46  
47 569 and scalability of CM by identifying the implementation strategies that support the adoption, scale-up  
48  
49 570 and replication of best practices in CM (78, 80). Given the complex nature of the CM intervention,  
50  
51 571 practitioners report challenges to implementation, especially considering the lack of guidelines or a  
52  
53 572 blueprint on how to operationalize its core components across different settings (81). Implementation is  
54  
55  
56  
57  
58  
59  
60

1  
2  
3 573 often poorly reported in published literature, which presents a challenge to both research and practice  
4  
5 574 and impedes replication and immediate adoption in a clinical setting (79, 82). To achieve wide-scale  
6  
7 575 adoption and replication, the CM intervention must be tailored to the local context in an approach that  
8  
9 576 considers the individual, the team of professionals, the organizational setting and the greater system  
10  
11 577 (81). Few studies have described, categorized and analyzed intervention implementation in a  
12  
13 578 contextually tailored approach (82). This research will thus provide this information for both researchers  
14  
15 579 and practitioners, which according to our knowledge, has not yet been done.  
16  
17  
18  
19  
20

580

### 581 **Study validity**

582 Construct validity is ensured through a detailed conceptual model and consistency in the application of  
583 its constructs in the data collection and analysis. Internal validity is ensured through a systematic coding  
584 and rigorous organization of collected data and the triangulation of several sources of qualitative data  
585 acquired from different participating stakeholders including patients, case managers, clinic managers,  
586 researchers, clinicians and informal caregivers (55). Analysis and comparison of different case studies in  
587 various implementation contexts will reinforce external validity and transferability. The observation and  
588 analysis of multiple levels, and their replication across several cases enhances both internal and external  
589 validity (55).  
590

591

### 591 **Figure Legend**

592 Figure 1: Conceptual model for the implementation analysis of a case management intervention  
593

594

### 594 **List of Abbreviations**

595 CEAC: Cost-effectiveness acceptability curves

596 CFIR: Consolidated framework for implementation research

1  
2  
3 597 CIHI: Canadian Institute of Health Information  
4

5 598 CIHR: Canadian Institutes for Health Research  
6

7 599 CCM: Chronic care model  
8

9 600 CM: Case management  
10

11 601 EMR: Electronic medical record  
12

13 602 ICER: Incremental cost-effectiveness ratio  
14

15 603 ICUR: Incremental cost-utility ratio  
16

17 604 ISP: Individualized services plan  
18

19 605 QALY: Quality-adjusted life years  
20

21 606  
22

23  
24  
25 607 **Declarations**

26  
27  
28 608 The funders played no role in designing the study, neither did they in data collection, analysis and  
29  
30 609 interpretation or in the writing of the manuscript.  
31

32 610 **Ethics approval**

33  
34 611 This project received approval from the CIUSSS de l'Estrie – CHUS Research Ethic Board (project number  
35  
36 612 MP-31-2019-2830).  
37

38  
39 613 **Consent for publication**

40  
41 614 This manuscript does not contain any individual person's data in any form.  
42

43 615 **Availability of data and materials**

44  
45 616 Not applicable.  
46

47  
48 617 **Competing interests**

49  
50 618 None declared.  
51

52 619 **Funding**  
53  
54  
55  
56  
57  
58  
59  
60

1  
2  
3 620 This work is supported by the Canadian Institutes of Health Research (CIHR) – Operating Grant: SPOR  
4  
5 621 PIHCI Network: Programmatic Grants (grant number 397896) and other partners such as Axe santé-  
6  
7 622 Population, organisations et pratiques du CRCHUS, Centre de recherche du CHUS, Département de  
8  
9 623 médecine de famille et médecine d’urgence (Université de Sherbrooke), Fondation de l’Université de  
10  
11 624 Sherbrooke, Fondation de Ma Vie, Fonds de recherche du Québec en santé, Institut universitaire de  
12  
13 625 première ligne en santé et services sociaux, Ministère de la santé et des services sociaux du Québec,  
14  
15 626 New Brunswick Health Research Foundation, Nova Scotia Health Authority, Faculty of Medicine of  
16  
17 627 Dalhousie University and Dalhousie Medical Research Foundation, Réseau-1 Québec, Saskatchewan  
18  
19 628 Health Research Foundation and Université de Sherbrooke and Université du Québec à Chicoutimi.  
20  
21  
22  
23  
24

### 25 630 **Author Contributions**

26  
27  
28 631 AD drafted the manuscript under the supervision of CH and MCC. All authors contributed to the  
29  
30 632 development of the protocol and read and approved the final manuscript.  
31

### 32 633 **Acknowledgements**

33  
34 634 The authors would like to thank the PriCare research group and collaborators for their coordination and  
35  
36 635 methodological support: PL Bush, Y Couturier, L Guénette, A Luke, P Morin, P Pluye, TG Poder, ME  
37  
38 636 Poitras, P Roberge, R Valaitis, V, C Longjohn, C Spence, J Porter, D Rubenstein, R Stoddard, S Bighead, C  
39  
40 637 Campbell, L Edwards, P Gauthier, R Gibson, J Labbé, F Dubé, DA Roy, T Sampalli, J Young, M Brodeur, B  
41  
42 638 Davis, S Gander, J Godbout, N Rabbitskin, J Splane, F Lemire, A Rondeau, N Senn, E Shadmi, and the  
43  
44 639 PriCare research team.  
45  
46  
47  
48  
49

### 50 641 **References**

51  
52 642 1. Chouinard MC, Hudon C, Dubois MF, Roberge P, Loignon C, Tchouaket E, et al. Case  
53 643 management and self-management support for frequent users with chronic disease in primary care: a  
54 644 pragmatic randomized controlled trial. BMC Health Serv Res. 2013;13:49.  
55  
56  
57  
58  
59  
60

- 1  
2  
3 645 2. Hudon C, Chouinard MC, Aubrey-Bassler K, Burge F, Doucet S, Ramsden VR, et al. Case  
4 646 management in primary care for frequent users of healthcare services with chronic diseases and  
5 647 complex care needs: an implementation and realist evaluation protocol. *BMJ Open*.  
6 648 2018;8(11):e026433.
- 7  
8 649 3. Hunt KA, Weber EJ, Showstack JA, Colby DC, Callaham ML. Characteristics of frequent users of  
9 650 emergency departments. *Ann Emerg Med*. 2006;48(1):1-8.
- 10 651 4. Lee KH, Davenport L. Can case management interventions reduce the number of emergency  
11 652 department visits by frequent users? *Health Care Manag*. 2006;25(2):155-9.
- 12 653 5. Mandelberg JH, Kuhn RE, Kohn MA. Epidemiologic analysis of an urban, public emergency  
13 654 department's frequent users. *Acad Emerg Med*. 2000;7(6):637-46.
- 14 655 6. Pope D, Fernandes CM, Bouthillette F, Etherington J. Frequent users of the emergency  
15 656 department: a program to improve care and reduce visits. *CMAJ*. 2000;162(7):1017-20.
- 16 657 7. Reinius P, Johansson M, Fjellner A, Werr J, Ohlen G, Edgren G. A telephone-based case-  
17 658 management intervention reduces healthcare utilization for frequent emergency department visitors.  
18 659 *Eur J Emerg Med*. 2013;20(5):327-34.
- 19 660 8. Clarke LH, Bennett EV. Constructing the moral body: self-care among older adults with multiple  
20 661 chronic conditions. *Health (N Y)*. 2013;17(3):211-28.
- 21 662 9. Rinke ML, Dietrich E, Kodeck T, Westcoat K. Operation care: a pilot case management  
22 663 intervention for frequent emergency medical system users. *Am J Emerg Med*. 2012;30(2):352-7.
- 23 664 10. Joo JY, Liu MF. Case management effectiveness in reducing hospital use: a systematic review. *Int*  
24 665 *Nurs Rev*. 2017;64(2):296-308.
- 25 666 11. Soril LJ, Leggett LE, Lorenzetti DL, Noseworthy TW, Clement FM. Reducing frequent visits to the  
26 667 emergency department: a systematic review of interventions. *PLoS One*. 2015;10(4):e0123660.
- 27 668 12. Moe J, Kirkland SW, Rawe E, Ospina MB, Vandermeer B, Campbell S, et al. Effectiveness of  
28 669 Interventions to Decrease Emergency Department Visits by Adult Frequent Users: A Systematic Review.  
29 670 *Acad Emerg Med*. 2017;24(1):40-52.
- 30 671 13. Shumway M, Boccellari A, O'Brien K, Okin RL. Cost-effectiveness of clinical case management for  
31 672 ED frequent users: results of a randomized trial. *Am J Emerg Med*. 2008;26(2):155-64.
- 32 673 14. European Observatory on Health Systems and Policies Series. Caring for people with chronic  
33 674 conditions: A health system perspective. Berkshire, England: Open University Press; 2008.
- 34 675 15. Wagner EH. Chronic disease management: what will it take to improve care for chronic illness?  
35 676 *Eff Clin Pract*. 1998;1(1):2-4.
- 36 677 16. World Health Organization. Innovative Care for Chronic Conditions: Building blocks for action.  
37 678 Geneva: World Health Organization; 2002.
- 38 679 17. Reynolds R, Dennis S, Hasan I, Slewa J, Chen W, Tian D, et al. A systematic review of chronic  
39 680 disease management interventions in primary care. *BMC Fam Pract*. 2018;19(1):11.
- 40 681 18. Valentijn PP, Schepman SM, Opheij W, Bruijnzeels MA. Understanding integrated care: a  
41 682 comprehensive conceptual framework based on the integrative functions of primary care. *Int J Integr*  
42 683 *Care*. 2013;13:e010.
- 43 684 19. Phillips GA, Brophy DS, Weiland TJ, Chenhall AJ, Dent AW. The effect of multidisciplinary case  
44 685 management on selected outcomes for frequent attenders at an emergency department. *Med J Aust*.  
45 686 2006;184(12):602-6.
- 46 687 20. Leutz WN. Five laws for integrating medical and social services: lessons from the United States  
47 688 and the United Kingdom. *Milbank Q*. 1999;77(1):77-110, iv-v.
- 48 689 21. Hudon C, Chouinard MC, Aubrey-Bassler K, Muhajarine N, Burge F, Pluye P, et al. Case  
49 690 management in primary care among frequent users of healthcare services with chronic conditions:  
50 691 protocol of a realist synthesis. *BMJ Open*. 2017;7(9):e017701.

- 1  
2  
3 692 22. Hudon C, Chouinard MC, Diadiou F, Lambert M, Bouliane D. Case Management in Primary Care  
4 693 for Frequent Users of Health Care Services With Chronic Diseases: A Qualitative Study of Patient and  
5 694 Family Experience. *Ann Fam Med*. 2015;13(6):523-8.  
6 695 23. Althaus F, Paroz S, Hugli O, Ghali WA, Daepfen JB, Peytremann-Bridevaux I, et al. Effectiveness  
7 696 of interventions targeting frequent users of emergency departments: a systematic review. *Ann Emerg*  
8 697 *Med*. 2011;58(1):41-52 e42.  
9 698 24. Bodenmann P, Velonaki VS, Griffin JL, Baggio S, Iglesias K, Moschetti K, et al. Case Management  
10 699 may Reduce Emergency Department Frequent use in a Universal Health Coverage System: a Randomized  
11 700 Controlled Trial. *J Gen Intern Med*. 2017;32(5):508-15.  
12 701 25. National Case Management Network of Canada. Connect, collaborate and communicate the  
13 702 power of case management: Canadian Standards of Practice in Case Management. Canada: National Case  
14 703 Management Network; 2009.  
15 704 26. Kumar GS, Klein R. Effectiveness of case management strategies in reducing emergency  
16 705 department visits in frequent user patient populations: a systematic review. *J Emerg Med*.  
17 706 2013;44(3):717-29.  
18 707 27. Edgren G, Anderson J, Dolk A, Torgerson J, Nyberg S, Skau T, et al. A case management  
19 708 intervention targeted to reduce healthcare consumption for frequent Emergency Department visitors:  
20 709 results from an adaptive randomized trial. *Eur J Emerg Med*. 2016;23(5):344-50.  
21 710 28. Hudon C, Chouinard MC, Pluye P, El Sherif R, Bush PL, Rihoux B, et al. Characteristics of Case  
22 711 Management in Primary Care Associated With Positive Outcomes for Frequent Users of Health Care: A  
23 712 Systematic Review. *Ann Fam Med*. 2019;17(5):448-58.  
24 713 29. Hudon C, Chouinard MC, Lambert M, Diadiou F, Bouliane D, Beaudin J. Key factors of case  
25 714 management interventions for frequent users of healthcare services: a thematic analysis review. *BMJ*  
26 715 *Open*. 2017;7(10):e017762.  
27 716 30. Costa PL, Graça AM, Marques-Quinteiro P, Santos CM, Caetano A, Passos AM. Multilevel  
28 717 Research in the Field of Organizational Behavior. *SAGE Open*. 2013;3(3).  
29 718 31. Rousseau DM, Aguinis H, Boyd BK, Pierce CA, Short JC. Reinforcing the Micro/Macro Bridge:  
30 719 Organizational Thinking and Pluralistic Vehicles. *Journal of Management*. 2010;37(2):429-42.  
31 720 32. Damschroder LJ, Aron DC, Keith RE, Kirsh SR, Alexander JA, Lowery JC. Fostering implementation  
32 721 of health services research findings into practice: a consolidated framework for advancing  
33 722 implementation science. *Implementation science* : IS. 2009;4:50.  
34 723 33. The SAGE Handbook of Process Organization Studies. London: SAGE Publications Ltd.; 2016  
35 724 [cited 2020 February 12]. Available from: [http://sk.sagepub.com/reference/the-sage-handbook-of-](http://sk.sagepub.com/reference/the-sage-handbook-of-process-organization-studies)  
36 725 [process-organization-studies](http://sk.sagepub.com/reference/the-sage-handbook-of-process-organization-studies).  
37 726 34. Bodenheimer T, Sinsky C. From triple to quadruple aim: care of the patient requires care of the  
38 727 provider. *Ann Fam Med*. 2014;12(6):573-6.  
39 728 35. Case management society of America. What is a case manager? 2019 [cited 2020 February 12].  
40 729 Available from: <https://www.cmsa.org/who-we-are/what-is-a-case-manager/>.  
41 730 36. Canadian Institutes of Health Research. Strategy for patient-oriented research 2019 [cited 2020  
42 731 February 12]. Available from: <https://cihr-irsc.gc.ca/e/41204.html>.  
43 732 37. National Collaboration for Integrated Care and Support. Integrated care and support: Our  
44 733 shared commitment. London: NHS; 2019 [cited 2020 February 12].  
45 734 38. Grover CA, Crawford E, Close RJ. The Efficacy of Case Management on Emergency Department  
46 735 Frequent Users: An Eight-Year Observational Study. *J Emerg Med*. 2016;51(5):595-604.  
47 736 39. Couturier Y, Gagnon D, Belzile L. La gestion de cas comme intermédiaire du "bien vieillir". Enre  
48 737 autonomisation des usagers et protocolarisation des services aux personnes âgées en perte  
49 738 d'autonomie. *Recherches sociologiques et anthropologiques*. 2013;44(1):117-35.



- 1  
2  
3 739 40. Borges Da Silva R, Brault I, Pineault R, Chouinard MC, Prud'homme A, D'Amour D. Nursing  
4 740 Practice in Primary Care and Patients' Experience of Care. *J Prim Care Community Health*.  
5 741 2018;9:2150131917747186.  
6 742 41. Freund T, Peters-Klimm F, Rochon J, Mahler C, Gensichen J, Erler A, et al. Primary care practice-  
7 743 based care management for chronically ill patients (PraCMan): study protocol for a cluster randomized  
8 744 controlled trial [ISRCTN56104508]. *Trials*. 2011;12:163.  
9 745 42. Carreau E, Brière N, Houle N, Dumont S, Maziade J, Paré L, et al., editors. Continuum of  
10 746 interprofessional collaborative practice in health and social care - Guide: Réseau de collaboration sur les  
11 747 pratiques interprofessionnelles en santé et services sociaux (RCPI); 2018.  
12 748 43. Grinberg C, Hawthorne M, LaNoue M, Brenner J, Mautner D. The Core of Care Management: The  
13 749 Role of Authentic Relationships in Caring for Patients with Frequent Hospitalizations. *Population health*  
14 750 *management*. 2016;19(4):248-56.  
15 751 44. Manafo E, Petermann L, Mason-Lai P, Vandall-Walker V. Patient engagement in Canada: a  
16 752 scoping review of the 'how' and 'what' of patient engagement in health research. *Health Res Policy Syst*.  
17 753 2018;16(1):5.  
18 754 45. Rijken M, Struckmann V, van der Heide I, Hujala A, Barbabella F, van Ginneken E, et al. How to  
19 755 improve care for people with multimorbidity in Europe? *Int J Integr Care*. 2016;16(6):A209.  
20 756 46. Coulter A, Entwistle VA, Eccles A, Ryan S, Shepperd S, Perera R. Personalised care planning for  
21 757 adults with chronic or long-term health conditions. *Cochrane Database Syst Rev*. 2015(3):Cd010523.  
22 758 47. Sadowski LS, Kee RA, VanderWeele TJ, Buchanan D. Effect of a housing and case management  
23 759 program on emergency department visits and hospitalizations among chronically ill homeless adults: a  
24 760 randomized trial. *JAMA*. 2009;301(17):1771-8.  
25 761 48. Schoen C, Osborn R, Squires D, Doty M, Pierson R, Applebaum S. New 2011 survey of patients  
26 762 with complex care needs in eleven countries finds that care is often poorly coordinated. *Health Aff*  
27 763 (Millwood). 2011;30(12):2437-48.  
28 764 49. Rijken M, Van der Heide I, Heijmans M. Individual care plans in chronic illness care: aims, use  
29 765 and outcomes. *International Journal of Integrated Care*. 2016;16(6).  
30 766 50. Chan BT, Ovens HJ. Frequent users of emergency departments. Do they also use family  
31 767 physicians' services? *Can Fam Physician*. 2002;48:1654-60.  
32 768 51. Ramos Salazar L. The Effect of Patient Self-Advocacy on Patient Satisfaction: Exploring Self-  
33 769 Compassion as a Mediator. *Communication Studies*. 2018;69(5):567-82.  
34 770 52. Health Council of Canada. Self-management support for Canadians with chronic health  
35 771 conditions. Canada: Health Council of Canada; 2012 [cited 2020 February 12]. Available from:  
36 772 [https://www.selfmanagementbc.ca/uploads/HCC\\_SelfManagementReport\\_FA.pdf](https://www.selfmanagementbc.ca/uploads/HCC_SelfManagementReport_FA.pdf).  
37 773 53. Berthiaume P, Fortier D. [Motivational interview]. *Perspective infirmiere : revue officielle de*  
38 774 *l'Ordre des infirmières et infirmiers du Québec*. 2012;9(2):34-7.  
39 775 54. Miles MB, Huberman AM, Saldana J. *Qualitative Data Analysis: A Methods Sourcebook*.  
40 776 Thousand Oaks: SAGE publications; 2014.  
41 777 55. Yin RK. *Case study research design and methods*. 5th ed. ed. Thousand Oaks, CA: Sage; 2014.  
42 778 56. Brousselle A, Champagne F, Contandriopoulos A, Hartz Z. *L'Évaluation: Concepts et Méthodes*.  
43 779 Brousselle A, Champagne F, Contandriopoulos A, Hartz Z, editors. Canada: Les Presses de l'Université de  
44 780 Montréal; 2011.  
45 781 57. *Embedded Case Study Methods*. 2002 [cited February 12, 2020]. Thousand Oaks, California:  
46 782 SAGE Publications, Inc., [cited February 12, 2020]. Available from:  
47 783 <https://methods.sagepub.com/book/embedded-case-study-methods>.  
48 784 58. Canadian Institute for Health Information. *Patient Cost Estimator Canada*: Canadian Institute for  
49 785 Health Information; 2019 [cited 2020 February 12, 2020]. Available from:  
50 786 <https://www.cihi.ca/en/patient-cost-estimator>.

- 1  
2  
3 787 59. Chew LD, Bradley KA, Boyko EJ. Brief questions to identify patients with inadequate health  
4 788 literacy. *Fam Med*. 2004;36(8):588-94.
- 5 789 60. Hudon E, Hudon C, Couture EM, Lavoie M, Lambert M, Bouliane D. Measuring Health Literacy in  
6 790 Primary Health Care: Validation of a French-Language Version of a Three-Item Questionnaire. North  
7 791 American Primary Care Research Group Annual Meeting; Colorado Springs, USA2016.
- 8 792 61. Poitras ME, Fortin M, Hudon C, Haggerty J, Almirall J. Validation of the disease burden morbidity  
9 793 assessment by self-report in a French-speaking population. *BMC Health Serv Res*. 2012;12:35.
- 10 794 62. Bayliss EA, Ellis JL, Steiner JF. Subjective assessments of comorbidity correlate with quality of life  
11 795 health outcomes: initial validation of a comorbidity assessment instrument. *Health and quality of life*  
12 796 *outcomes*. 2005;3:51.
- 13 797 63. Hudon E, Hudon C, Lambert M, Chouinard MC. Validation of a French-language version of a  
14 798 patient-reported measure of integrated care. North American Primary Care Research Group Annual  
15 799 Meeting; Colorado Springs, USA2016.
- 16 800 64. Smith D, Harvey P, Lawn S, Harris M, Battersby M. Measuring chronic condition self-  
17 801 management in an Australian community: factor structure of the revised Partners in Health (PIH) scale.  
18 802 *Qual Life Res*. 2017;26(1):149-59.
- 19 803 65. Hudon E, Hudon C, Lambert M, Chouinard MC. Measuring self-management of patients with  
20 804 chronic disease in primary care: Validation of a French-language version of the Partner in Health Scale.  
21 805 North American Primary Care Research Group Annual Meeting; Colorado Springs, USA2016.
- 22 806 66. Ware J. User manual for the SF-36v2 Health survey second edition. Lincoln, RI: Quality Metric  
23 807 Incorporated; 2007.
- 24 808 67. Brazier JE, Roberts J. The estimation of a preference-based measure of health from the SF-12.  
25 809 *Med Care*. 2004;42(9):851-9.
- 26 810 68. Kessler RC, Barker PR, Colpe LJ, Epstein JF, Gfroerer JC, Hiripi E, et al. K-6 Distress Scale - Self  
27 811 Administered 2003 [cited 2020 February 12, 2020]. Available from: [http://www.midss.org/content/k-6-](http://www.midss.org/content/k-6-distress-scale-self-administered)  
28 812 [distress-scale-self-administered](http://www.midss.org/content/k-6-distress-scale-self-administered).
- 29 813 69. Haynes A, Brennan S, Redman S, Williamson A, Gallego G, Butow P. Figuring out fidelity: a  
30 814 worked example of the methods used to identify, critique and revise the essential elements of a  
31 815 contextualised intervention in health policy agencies. *Implementation Science*. 2016;11(1).
- 32 816 70. Breitenstein SM, Gross D, Garvey CA, Hill C, Fogg L, Resnick B. Implementation fidelity in  
33 817 community-based interventions. *Res Nurs Health*. 2010;33(2):164-73.
- 34 818 71. Carroll C, Patterson M, Wood S, Booth A, Rick J, Balain S. A conceptual framework for  
35 819 implementation fidelity. *Implementation science : IS*. 2007;2:40.
- 36 820 72. Pluye P, Bengoechea EG, Granikov V, Kaur N, Li Tang D. A World of Possibilities in Mixed  
37 821 Methods: Review of the combinations of strategies used to integrate qualitative and quantitative  
38 822 phases, results and data. *International Journal of Multiple Research Approaches*. 2018;10(1):41-56.
- 39 823 73. Craig P, Dieppe P, Macintyre S, Michie S, Nazareth I, Petticrew M, et al. Developing and  
40 824 evaluating complex interventions: the new Medical Research Council guidance. *BMJ*. 2008;337:a1655.
- 41 825 74. Ramsey S, Willke R, Briggs A, Brown R, Buxton M, Chawla A, et al. Good research practices for  
42 826 cost-effectiveness analysis alongside clinical trials: the ISPOR RCT-CEA Task Force report. *Value Health*.  
43 827 2005;8(5):521-33.
- 44 828 75. Fenwick E, O'Brien BJ, Briggs A. Cost-effectiveness acceptability curves--facts, fallacies and  
45 829 frequently asked questions. *Health Econ*. 2004;13(5):405-15.
- 46 830 76. Rogers PJ. Using Programme Theory to Evaluate Complicated and Complex Aspects of  
47 831 Interventions. *Evaluation*. 2008;14(1):29-48.
- 48 832 77. Rossi PH, Lipsey MW, Freeman HE. Expressing and Assessing Program Theory. In: Sage tE, editor.  
49 833 *Evaluation: A Systematic Approach*. Thousand Oaks, CA2004. p. 152-78.

- 1  
2  
3 834 78. Huynh AK, Hamilton AB, Farmer MM, Bean-Mayberry B, Stirman SW, Moin T, et al. A Pragmatic  
4 835 Approach to Guide Implementation Evaluation Research: Strategy Mapping for Complex Interventions.  
5 836 Front Public Health. 2018;6:134.  
6 837 79. Proctor EK, Powell BJ, McMillen JC. Implementation strategies: recommendations for specifying  
7 838 and reporting. Implementation science : IS. 2013;8:139.  
8 839 80. Castiglione SA, Ritchie JA. Moving into action: We know what practices we want to change, now  
9 840 what? An implementation guide for health care practitioners. Ottawa, ON: Canadian Institutes of Health  
10 841 Research; 2012 [cited 2020 February 12]. Available from: [https://www.nccmt.ca/knowledge-](https://www.nccmt.ca/knowledge-repositories/search/159)  
11 842 [repositories/search/159](https://www.nccmt.ca/knowledge-repositories/search/159).  
12 843 81. Kadu MK, Stolee P. Facilitators and barriers of implementing the chronic care model in primary  
13 844 care: a systematic review. BMC Fam Pract. 2015;16:12.  
14 845 82. Boyd MR, Powell BJ, Endicott D, Lewis CC. A Method for Tracking Implementation Strategies: An  
15 846 Exemplar Implementing Measurement-Based Care in Community Behavioral Health Clinics. Behav Ther.  
16 847 2018;49(4):525-37.  
17 848  
18  
19  
20  
21  
22  
23  
24  
25  
26  
27  
28  
29  
30  
31  
32  
33  
34  
35  
36  
37  
38  
39  
40  
41  
42  
43  
44  
45  
46  
47  
48  
49  
50  
51  
52  
53  
54  
55  
56  
57  
58  
59  
60

Figure 1. Conceptual model for the implementation analysis of a case management intervention

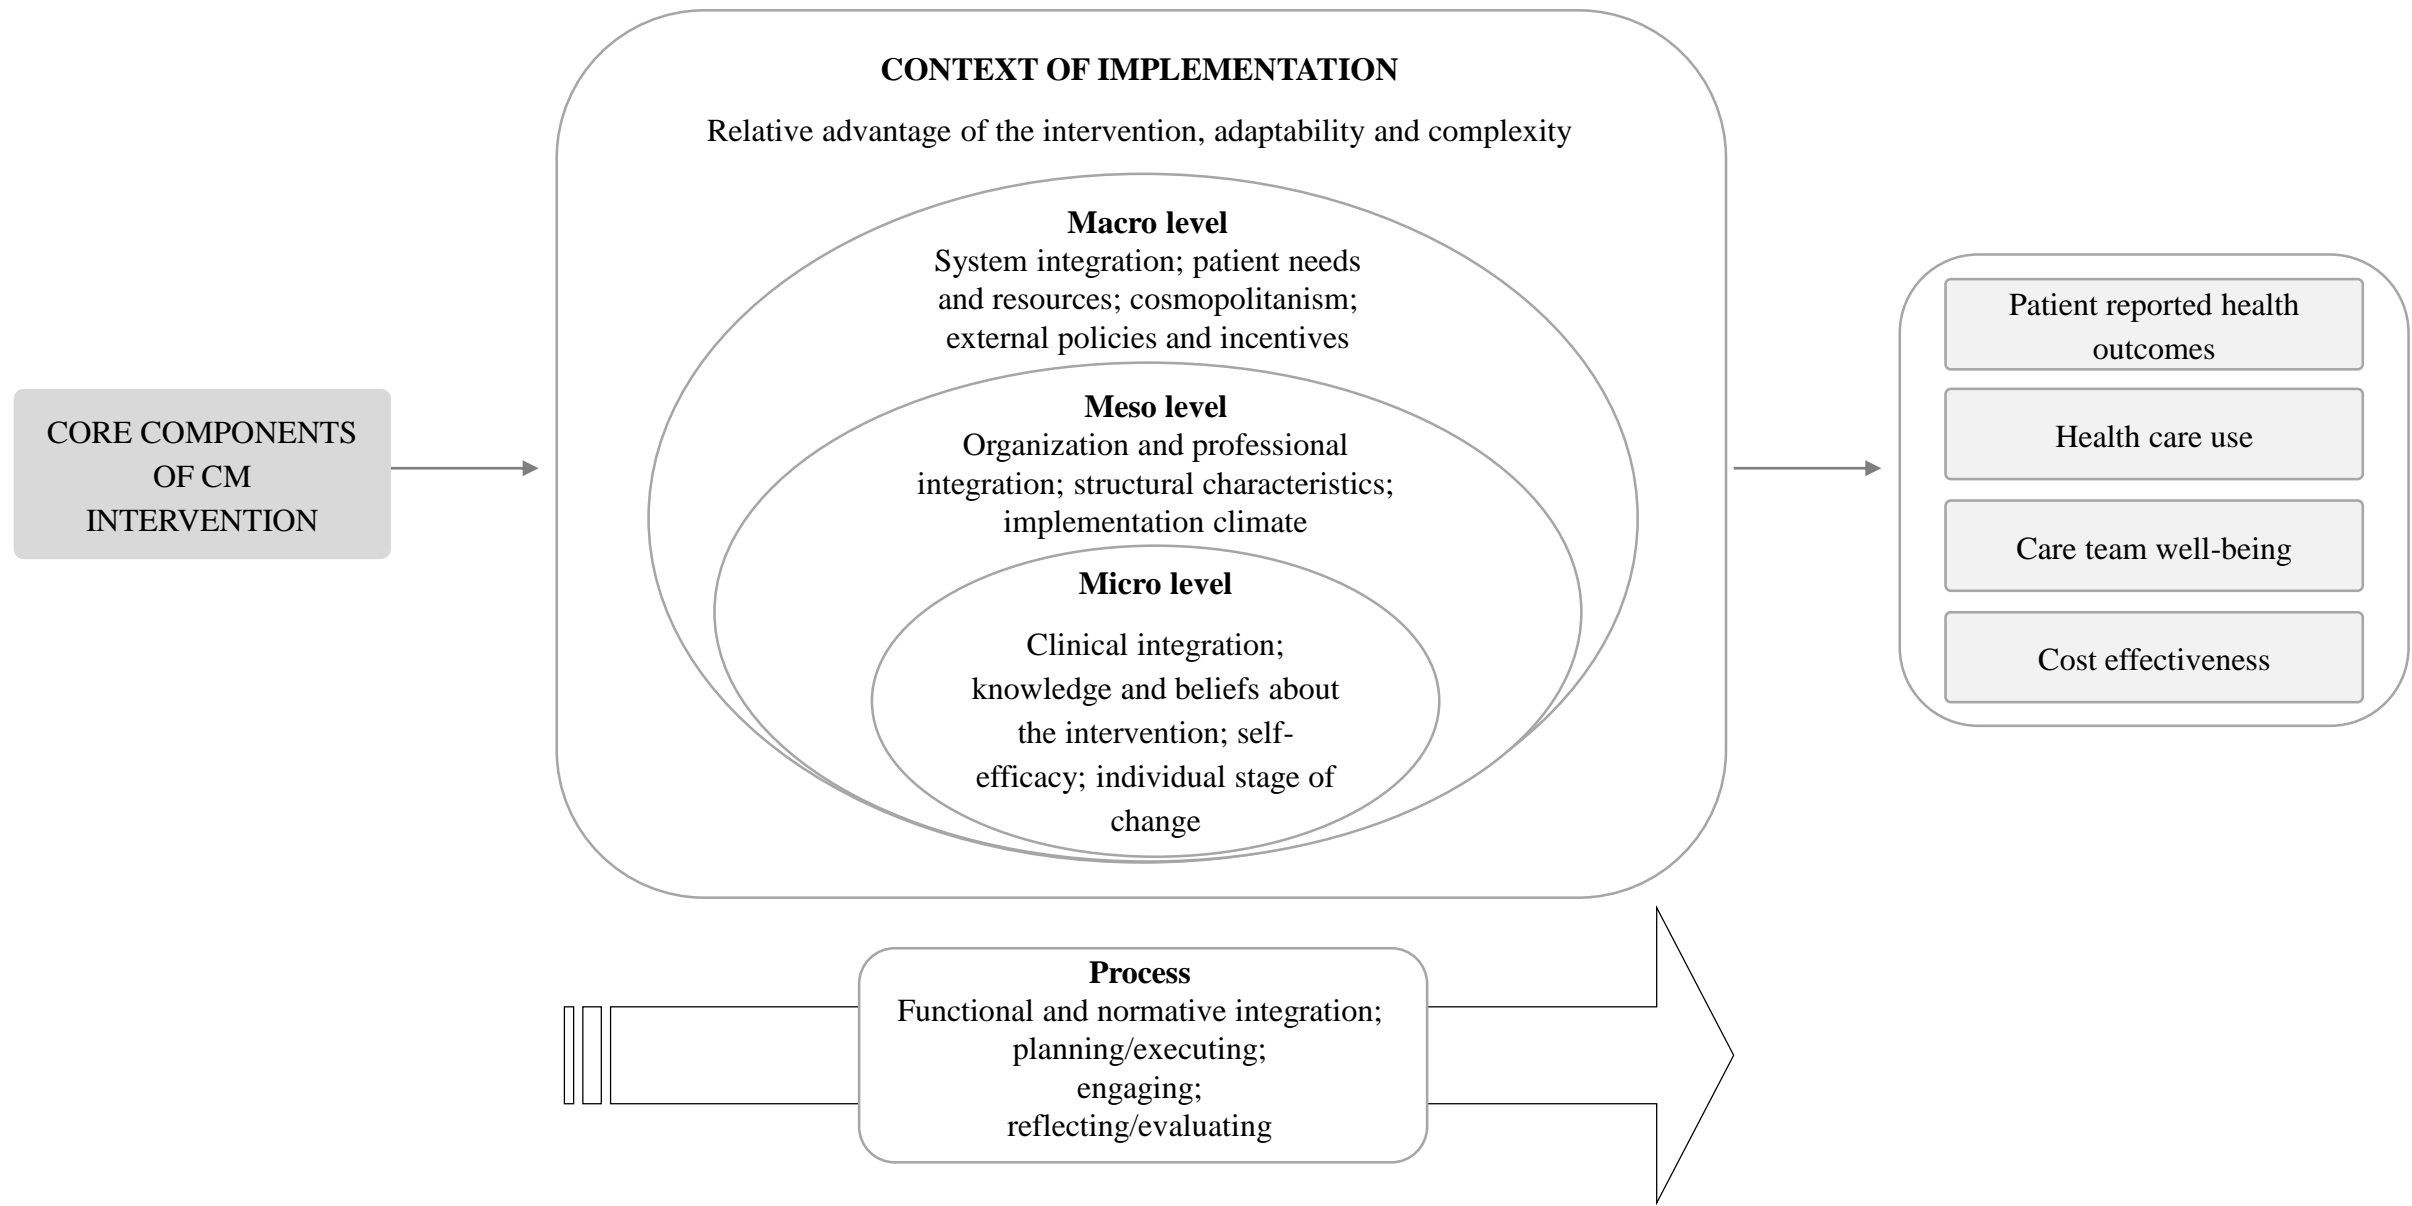

For peer review only - <http://bmjopen.bmj.com/site/about/guidelines.xhtml>

# BMJ Open

## Protocol for a mixed-method analysis of implementation of case management in primary care for frequent users of health care services with chronic diseases and complex care needs

|                                 |                                                                                                                                                                                                                                                                                                                                                                                                                                                                                                                                                                                                                                                                                                                                                                                                                                                             |
|---------------------------------|-------------------------------------------------------------------------------------------------------------------------------------------------------------------------------------------------------------------------------------------------------------------------------------------------------------------------------------------------------------------------------------------------------------------------------------------------------------------------------------------------------------------------------------------------------------------------------------------------------------------------------------------------------------------------------------------------------------------------------------------------------------------------------------------------------------------------------------------------------------|
| Journal:                        | <i>BMJ Open</i>                                                                                                                                                                                                                                                                                                                                                                                                                                                                                                                                                                                                                                                                                                                                                                                                                                             |
| Manuscript ID                   | bmjopen-2020-038241.R1                                                                                                                                                                                                                                                                                                                                                                                                                                                                                                                                                                                                                                                                                                                                                                                                                                      |
| Article Type:                   | Protocol                                                                                                                                                                                                                                                                                                                                                                                                                                                                                                                                                                                                                                                                                                                                                                                                                                                    |
| Date Submitted by the Author:   | 06-May-2020                                                                                                                                                                                                                                                                                                                                                                                                                                                                                                                                                                                                                                                                                                                                                                                                                                                 |
| Complete List of Authors:       | Danish, Alya; Universite de Sherbrooke - Campus de Longueuil, Faculté de médecine et des sciences de la santé<br>Chouinard, Maud-Christine; Université du Québec à Chicoutimi, Sciences de la santé<br>Aubrey-Bassler, Kris; Memorial University of Newfoundland<br>Burge, Fred ; Dalhousie University<br>Doucet, Shelley; University of New Brunswick, Department of Nursing and Health Sciences<br>Ramsden, Vivian; University of Saskatchewan, Department of Academic Family Medicine<br>Bisson, Mathieu; Universite de Sherbrooke<br>Cassidy, Monique<br>Condran, Brian; Dalhousie University<br>Lambert, Mireille; Centre intégré universitaire de santé et de services sociaux du Saguenay-Lac-Saint-Jean<br>Penney, Carla; Memorial University of Newfoundland<br>Sabourin, Véronique<br>Warren, Mike<br>Hudon, Catherine; Université de Sherbrooke, |
| <b>Primary Subject Heading</b>: | Health services research                                                                                                                                                                                                                                                                                                                                                                                                                                                                                                                                                                                                                                                                                                                                                                                                                                    |
| Secondary Subject Heading:      | General practice / Family practice, Research methods                                                                                                                                                                                                                                                                                                                                                                                                                                                                                                                                                                                                                                                                                                                                                                                                        |
| Keywords:                       | PRIMARY CARE, QUALITATIVE RESEARCH, Organisation of health services < HEALTH SERVICES ADMINISTRATION & MANAGEMENT, Protocols & guidelines < HEALTH SERVICES ADMINISTRATION & MANAGEMENT                                                                                                                                                                                                                                                                                                                                                                                                                                                                                                                                                                                                                                                                     |
|                                 |                                                                                                                                                                                                                                                                                                                                                                                                                                                                                                                                                                                                                                                                                                                                                                                                                                                             |

SCHOLARONE™  
Manuscripts



I, the Submitting Author has the right to grant and does grant on behalf of all authors of the Work (as defined in the below author licence), an exclusive licence and/or a non-exclusive licence for contributions from authors who are: i) UK Crown employees; ii) where BMJ has agreed a CC-BY licence shall apply, and/or iii) in accordance with the terms applicable for US Federal Government officers or employees acting as part of their official duties; on a worldwide, perpetual, irrevocable, royalty-free basis to BMJ Publishing Group Ltd ("BMJ") its licensees and where the relevant Journal is co-owned by BMJ to the co-owners of the Journal, to publish the Work in this journal and any other BMJ products and to exploit all rights, as set out in our [licence](#).

The Submitting Author accepts and understands that any supply made under these terms is made by BMJ to the Submitting Author unless you are acting as an employee on behalf of your employer or a postgraduate student of an affiliated institution which is paying any applicable article publishing charge ("APC") for Open Access articles. Where the Submitting Author wishes to make the Work available on an Open Access basis (and intends to pay the relevant APC), the terms of reuse of such Open Access shall be governed by a Creative Commons licence – details of these licences and which [Creative Commons](#) licence will apply to this Work are set out in our licence referred to above.

Other than as permitted in any relevant BMJ Author's Self Archiving Policies, I confirm this Work has not been accepted for publication elsewhere, is not being considered for publication elsewhere and does not duplicate material already published. I confirm all authors consent to publication of this Work and authorise the granting of this licence.

1  
2  
3 1 **Protocol for a mixed-method analysis of implementation of case management in primary care for**  
4  
5 2 **frequent users of health care services with chronic diseases and complex care needs**  
6  
7 3

8  
9  
10 4 Danish A<sup>1</sup>, Chouinard MC<sup>2</sup>, Aubrey-Bassler K<sup>3</sup>, Burge F<sup>4</sup>, Doucet S<sup>5</sup>, Ramsden V<sup>6</sup>, Bisson M<sup>1</sup>, Cassidy M<sup>5</sup>,  
11  
12 5 Condran B<sup>4</sup>, Lambert M<sup>2</sup>, Penney C<sup>3</sup>, Sabourin V<sup>7</sup>, Warren M<sup>8</sup>, Hudon C<sup>1,9</sup>.  
13  
14 6

15  
16  
17 7 <sup>1</sup>Department of Family Medicine and Emergency Medicine, Université de Sherbrooke, Sherbrooke,  
18  
19 8 Québec, Canada

20  
21 9 <sup>2</sup>Department of Health Sciences, Université du Québec à Chicoutimi, Chicoutimi, Québec, Canada

22  
23 10 <sup>3</sup>Primary Healthcare Research Unit, Memorial University, St-John's, Newfoundland and Labrador,  
24  
25 11 Canada

26  
27  
28 12 <sup>4</sup>Department of Family Medicine, Dalhousie University, Halifax, Nova Scotia, Canada

29  
30 13 <sup>5</sup>Department of Nursing and Health Sciences, University of New Brunswick, Fredericton, New Brunswick,  
31  
32 14 Canada

33  
34 15 <sup>6</sup>Department of Academic Family Medicine, University of Saskatchewan, Saskatoon, Saskatchewan,  
35  
36 16 Canada

37  
38  
39 17 <sup>7</sup>Quebec-SPOR SUPPORT unit, Québec, Québec, Canada

40  
41 18 <sup>8</sup>NL SPOR SUPPORT Unit, St. John's, Newfoundland and Labrador, Canada

42  
43 19 <sup>9</sup>Centre hospitalier universitaire de Sherbrooke Research Center, Sherbrooke, Quebec, Canada  
44  
45 20

46  
47  
48 21 Corresponding author: Alya Danish; [alya.danish@usherbrooke.ca](mailto:alya.danish@usherbrooke.ca)  
49  
50 22

51  
52 23 **Word Count:** 6508 words  
53  
54  
55  
56  
57  
58  
59  
60

1  
2  
3 24 **Abstract**  
4

5 25 *Introduction:* Case management (CM) in a primary care setting is a promising approach to integrating  
6  
7 26 and improving health care services and outcomes for patients with chronic conditions and complex care  
8  
9  
10 27 needs who frequently use healthcare services. Despite evidence supporting CM and interest in  
11  
12 28 implementing it in Canada, little is known about how to do this. This research aims to identify the  
13  
14 29 barriers and facilitators to the implementation of a CM intervention in different primary care contexts  
15  
16 30 (objective 1) and to explain the influence of the clinical context on the degree of implementation  
17  
18 31 (objective 2) and on the outcomes of the intervention (objective 3).  
19  
20  
21 32

22  
23 33 *Methods and analysis:* A multiple-case embedded mixed methods study will be conducted on CM  
24  
25 34 implemented in ten primary care clinics across five Canadian provinces. Each clinic will represent a sub-  
26  
27 35 unit of analysis, detailed through a case history. Cases will be compared and contrasted using multiple  
28  
29 36 analytical approaches. Qualitative data (objectives 1 and 2) from individual semi-structured interviews  
30  
31 37 (N=130), focus group discussions (N=20) and participant observation of each clinic (36 hours) will be  
32  
33 38 compared and integrated with quantitative (objective 3) clinical data on services use (N=300) and  
34  
35 39 patient questionnaires (N=300). An evaluation of intervention fidelity will be integrated into the data  
36  
37 40 analysis.  
38  
39  
40  
41  
42

43 42 *Ethics and dissemination:* This project received approval from the CIUSSS de l'Estrie – CHUS Research  
44  
45 43 Ethic Board (project number MP-31-2019-2830). Results will provide the opportunity to refine the CM  
46  
47 44 intervention and to facilitate effective evaluation, replication and scale-up. This research provides  
48  
49 45 knowledge on how to respond to the needs of individuals with chronic conditions and complex care  
50  
51 46 needs in a cost-effective way that improves patient reported outcomes and health care use, while  
52  
53  
54  
55  
56  
57  
58  
59  
60



1  
2  
3 47 ensuring care team well-being. Dissemination of results is planned and executed based on the needs of  
4  
5 48 various stakeholders involved in the research.  
6

7  
8 **49 Keywords**

9  
10 50 Primary health care; case management; chronic illness; complex care needs; frequent users;  
11  
12 51 implementation; evaluation; context, intervention fidelity.  
13

14 52  
15  
16 **53 Article Summary**

17  
18 *54 Strength and limitations of this study*

- 19  
20  
21 55 • This protocol details the steps for the implementation of a case management (CM) intervention  
22  
23 56 for frequent users of health services with chronic conditions and complex care needs.  
24  
25  
26 57  
27  
28 58 • A novel conceptual model for CM implementation is proposed based on the integrative  
29  
30 59 functions of primary care and the effective implementation of health care interventions.  
31  
32 60  
33  
34 61 • The barriers and facilitators to implementing CM will be detailed and the influence of the clinical  
35  
36 62 context on the degree of implementation and on the outcomes of the intervention will be  
37  
38 63 evaluated.  
39  
40  
41 64  
42 65 • While the proposed conceptual model does not cover every possible construct for effective  
43  
44 66 implementation, an inductive approach to data analysis will be used to allow for emergent  
45  
46 67 themes and all stakeholders will participate in data analysis in order to ensure validity.  
47  
48  
49 68

50  
51 **69 Introduction**

52  
53  
54 70 A priority for primary care research and the Canadian health care system is to address the complex  
55  
56 71 needs of patients who frequently use health care services (1, 2). These patients may suffer from a  
57  
58  
59  
60

1  
2  
3 72 combination of chronic illnesses, mental illness and/or socioeconomic vulnerabilities (3-5). Patients with  
4  
5 73 chronic illnesses typically have a wide range of needs that require them to adopt new behaviours, such  
6  
7 74 as meeting with care providers on a regular basis, adhering to treatment plans, monitoring their  
8  
9  
10 75 symptoms and making important decisions while also changing aspects of their lifestyle to preserve their  
11  
12 76 physical, psychological and social well-being (6-8). Far from “misusing” the health care system, studies  
13  
14 77 show that frequent users do so in an attempt to address unmet needs for health care and social services  
15  
16 78 (3, 9). Studies suggest that these attempts are often unsuccessful and result in repetitive use of services  
17  
18 79 in an uncoordinated way through frequent hospitalizations or visits to the emergency department (10,  
19  
20 80 11). This leads to negative experiences for both the care providers and for the patients, poor health  
21  
22 81 indicators and high mortality rates for the patients and considerable costs to the health care system (11-  
23  
24 82 13). Several countries have therefore experimented with new models of health care delivery that can  
25  
26 83 achieve better coordination and integration of services, some of which have been found to reduce  
27  
28 84 fragmentation and improve care continuity (14). Early examples of such models include the Chronic Care  
29  
30 85 Model (CCM) (15) and the Innovative Care for Chronic Conditions framework (16). These models  
31  
32 86 emphasize the importance of providing support to patients for self-management and decision-making,  
33  
34 87 seeking innovative approaches within available clinical information systems and proposing ways to  
35  
36 88 redesign the delivery of health care (14).  
37  
38  
39  
40  
41  
42

43 90 Individuals with chronic illnesses require organized care and close follow-up delivered over an extended  
44  
45 91 period of time (17). The primary care setting is the most suitable for supporting individuals with chronic  
46  
47 92 illnesses due to its defining features of patient-centered first contact, continuous, comprehensive, and  
48  
49 93 coordinated care (17, 18). Health systems built on the principles of primary care achieve better health  
50  
51 94 outcomes and greater equity, at a lower cost (19) than systems with a specialty care orientation (18).  
52  
53  
54 95 Integrated care may be achieved in a primary care setting through the creation of inter-sectorial linkages  
55  
56  
57  
58  
59  
60

1  
2  
3 96 between health and social policies, i.e. the linking of health care to other human service systems (eg.  
4  
5 97 long-term care, education, vocational and housing services) in order to improve clinical outcomes,  
6  
7 98 patient and provider satisfaction and efficiency (14, 18, 20).  
9

10 99

## 11 12 100 **Case management**

13  
14 101 Case management (CM) in a primary care setting is one approach that has been shown to increase the  
15  
16 102 integration of health services (21, 22) and to improve care and outcomes for patients with chronic  
17  
18 103 conditions and complex needs who frequently use health care services (23, 24). Defined as “a  
20  
21 104 collaborative, client-driven process for the provision of quality health and support services through the  
22  
23 105 effective and efficient use of resources” (25), CM is among the best models available to mitigate the  
24  
25 106 high utilization of the health care system and associated costs (23, 26). An adaptive randomized trial of  
26  
27 107 CM interventions targeting frequent users of health services demonstrated that appropriate patient  
28  
29 108 identification, staff training and centralized intervention delivery are components of CM that can be  
30  
31 109 successfully implemented on a large scale and lead to a decrease in health consumption (27). A recent  
32  
33 110 systematic review (10) identified the most common components of CM interventions for chronically ill  
34  
35 111 patients including the integration of services between hospitals and home or other facilities, regular  
36  
37 112 home visits, regular telephone calls, individual assessment and care planning, education and self-  
38  
39 113 management support, psychosocial support, and ongoing supervision and assessment. The same study  
40  
41 114 found that a reduction in hospital admission rates was reported after implementation of CM  
42  
43 115 interventions (10). A systematic review of literature on the characteristics of CM interventions in  
44  
45 116 primary care reporting positive outcomes for frequent users of health care revealed three essential  
46  
47 117 requisites for success. First, the intervention must identify and target patients with the greatest needs,  
48  
49 118 and who are therefore most likely to benefit from the intervention. Second, the intervention must be  
50  
51 119 delivered with sufficient intensity (i.e. frequently enough or with a high enough dose) to produce the  
52  
53  
54  
55  
56  
57  
58  
59  
60

1  
2  
3 120 desired effect. Third, an interdisciplinary approach to care planning is preferred, where a variety of  
4  
5 121 professionals from both care and cure sectors actively participate in the intervention (28).  
6  
7 122  
8  
9  
10 123 Despite the evidence base supporting CM as an intervention for frequent users, little evidence exists  
11  
12 124 about the facilitators and barriers to CM implementation (29). Although there is a strong interest in  
13  
14 125 implementing CM in the Canadian primary care setting, little information is available on how to do this.  
15  
16 126 CM has rarely been implemented and documented systematically in order to identify and replicate best  
17  
18 127 practices. This protocol is part of a larger research program on CM in primary care for frequent users of  
19  
20 128 healthcare services with chronic diseases and complex care needs (2) and details the steps for the  
21  
22 129 implementation analysis that was not described in the original protocol of the whole program.  
23  
24  
25  
26  
27

130

### 131 **Objectives**

- 132 1) To identify the barriers and the facilitators to implementation of the CM intervention in different  
133 primary care contexts.  
134 2) To explain the influence of the clinical context on the degree of implementation.  
135 3) To evaluate the influence of the context of implementation on the outcomes of the intervention.

136

### 137 **Methods/Design**

#### 138 *Conceptual model*

139 The conceptual model developed to guide this research protocol was informed by two multi-level  
140 conceptual frameworks in order to analyze the effective implementation of an integrative primary care  
141 intervention. Multi-level frameworks represent the interacting layers of phenomena inherent to  
142 organizations and are commonly used to develop theories, measure and analyze phenomena while  
143 accounting for the complexity inherent to these systems (30, 31). Multi-level interventions mobilize

1  
2  
3 144 resources and facilitate linkages across organizations “to solve coordination problems and adapt to  
4  
5 145 change” (31).  
6  
7  
8 146

9  
10 147 The first framework used to guide this research protocol is the Valentijn et al. framework for integrated  
11  
12 148 care based on the integrative functions of primary care (18). The concept of integration originates from  
13  
14 149 organizational theory and refers to “the quality of the state of collaboration” that may exist among the  
15  
16 150 multiple levels of service delivery with the purpose of achieving a required mutual effort and agreement  
17  
18 151 (14). Integrated health care interventions are a means to improve access, quality and continuity of  
19  
20 152 services in a more efficient way, especially for people with complex needs (18) . This framework  
21  
22 153 describes the central role of primary care in integrating the multiple levels of health care: system  
23  
24 154 integration at the macro level; organizational and professional integration at the meso level; clinical  
25  
26 155 integration at the micro level; and functional and normative integration to link the macro, meso and  
27  
28 156 micro levels (18). Valentijn et al.’s framework is intended for analyzing and testing the causal  
29  
30 157 relationships within and between the integration levels, which interact to varying degrees depending on  
31  
32 158 the specific context of health care delivery (18). This framework is therefore suitable for studying the  
33  
34 159 different primary care contexts of the CM intervention from the perspective of integrated care and is  
35  
36 160 the unifying thread to the implementation and evaluation of the CM intervention.  
37  
38  
39  
40  
41 161

42  
43 162 The second framework used to guide this research protocol is the Consolidated Framework for  
44  
45 163 Implementation Research (CFIR), intended to promote effective implementation and formative  
46  
47 164 evaluation of complex, multi-level interventions in health care (32). The CFIR provides a taxonomy of  
48  
49 165 constructs that can be used to understand, measure and assess implementation across a variety of  
50  
51 166 contexts. The constructs are categorized into five major domains that similar to the Valentijn et al.  
52  
53 167 (2013) framework, reflect a multilevel perspective. The *outer setting* refers to the economic, political  
54  
55  
56  
57  
58  
59  
60

1  
2  
3 168 and social context in which the implementing organization is situated and corresponds to the macro  
4  
5 169 level. The *inner setting* corresponds to the meso level of the organizational context and includes  
6  
7 170 constructs such as the structure and culture of the implementing organization. At the micro level, the  
8  
9  
10 171 *individuals* involved in the intervention are described. The CFIR includes two additional domains: the  
11  
12 172 *characteristics of the intervention*, a description of its core components, and the *implementation*  
13  
14 173 *process*, considered a dynamic, non-sequential and non-linear domain that can stem from any level,  
15  
16 174 macro, meso or micro (32). When understood, process provides insight that links the various levels of  
17  
18 175 analysis and shed light on the causal or generative mechanisms underlying the intervention being  
19  
20 176 studied (32, 33). Barriers and facilitators may arise at multiple levels of intervention delivery, as external  
21  
22 177 influencers, organizational or professional components or during the process by which an intervention is  
23  
24 178 adopted within an organization (32).  
25  
26  
27  
28  
29

30 180 The conceptual model developed to guide this research protocol is presented in Figure 1. On the left  
31  
32 181 side of the figure are the core components of the CM intervention, described in the proceeding section.  
33  
34 182 During implementation, the intervention takes on unique properties and characteristics related to the  
35  
36 183 local context in which it is introduced (referred to in Figure 1 as the *context of implementation*) (32). The  
37  
38 184 context of implementation includes macro, meso and micro level determinants, depicted by the  
39  
40 185 concentric circles in the middle of the figure. The process of implementation is represented by the arrow  
41  
42 186 at the bottom of the figure, which represents the dynamic and continuous nature of intervention  
43  
44 187 implementation. Finally, to the right, are the final expected outcomes of the intervention, based on the  
45  
46 188 quadruple aims to optimize health system performance: improved patient outcomes, health care use,  
47  
48 189 care team well-being and cost effectiveness (34).  
49  
50  
51

52 190  
53  
54  
55  
56  
57  
58  
59  
60

1  
2  
3 191 Constructs were selected from both Valentijn et al. (2013) and Damschroder et al. (2009) to reflect the  
4  
5 192 objectives of this research. The characteristics of the intervention after implementation in a particular  
6  
7 193 local context will be analyzed based on the intervention's *adaptability* to meet local needs, its *relative*  
8  
9 194 *advantage* to the context, and its *complexity* or difficulty of implementation. At the macro level, how  
10  
11 195 the intervention contributes to *system integration* will be examined, including vertical integration and  
12  
13 196 collaboration across care sectors and horizontal integration through a holistic view of the patient (18).  
14  
15 197 This construct reflects the implementing organization's knowledge of the needs of its patient population  
16  
17 198 and its ability to respond with appropriate structures, techniques and resources (*patient needs and*  
18  
19 199 *resources*) (32). The organization's degree of networking with external services and structures  
20  
21 200 (*cosmopolitanism*) will be examined, as well as its formal strategies and policies supporting external  
22  
23 201 linkages (*external policies and incentives*).  
24  
25  
26  
27  
28 202  
29  
30 203 At the meso level, *organizational* and *professional integration* will be examined, which refer to the  
31  
32 204 partnerships between services and professionals within the implementing organization. The *structural*  
33  
34 205 *characteristics* of the organization and the *implementation climate* will be described. At the micro level,  
35  
36 206 interest will shift to *clinical integration*, which reflects the level of coordination and coherence of the  
37  
38 207 primary care delivery process (18). The *knowledge and beliefs* of the various professionals involved in  
39  
40 208 the intervention will be examined, as well as their perceived *self-efficacy* to implement CM, and their  
41  
42 209 *individual stage of change*, which refers to their progress towards full adoption and sustained use of the  
43  
44 210 intervention (32).  
45  
46  
47  
48 211  
49  
50 212 Finally, the process of implementation will be analyzed by examining how the CM intervention was  
51  
52 213 planned and executed at the local level, how professionals were mobilized and engaged for participation  
53  
54 214 in the intervention, and by examining the mechanisms put in place to discuss and provide feedback  
55  
56  
57  
58  
59  
60

1  
2  
3 215 about the experience, progress and quality of implementation (*planning/executing; engaging;*  
4  
5 216 *reflecting/evaluating*). These constructs reflect the level of *functional* and *normative integration*  
6  
7 217 resulting from the implementation of the intervention: how the implementing organization mobilized  
8  
9 218 management functions in support of the intervention, as well as the degree of development of a shared  
10  
11 219 goal or mission among participating individuals and partner organizations for the implementation of the  
12  
13 220 intervention (18).  
14  
15  
16  
17  
18

19 222 *The intervention*

20  
21 223 An intervention was designed to reflect the standards of practice of the National Case Management of  
22  
23 224 Canada as well as the Case management society of America (25, 35). The activities of the intervention  
24  
25 225 follow the Canadian Institutes for Health Research (CIHR) Strategy for Patient Oriented research and  
26  
27 226 incorporate the integration characteristics of the National Collaboration for Integrated Care and Support  
28  
29 227 (36, 37). Patients with chronic conditions most often seek and receive comprehensive care in a primary  
30  
31 228 care setting (38) and the leadership of a case manager who is experienced in primary care has been  
32  
33 229 shown to facilitate the successful implementation of chronic care models (39). The CM intervention is  
34  
35 230 therefore designed to be delivered by a primary care health professional in a primary care clinical setting  
36  
37 231 over a period of 12 months.  
38  
39  
40

41 232  
42  
43 233 In consideration of these guidelines and of the results of previously cited studies (10, 11, 23, 27, 28), an  
44  
45 234 intervention was designed comprised of four main components: 1) evaluation of patient needs and  
46  
47 235 preferences; 2) co-development and maintenance of a patient-centered individualized services plan; 3)  
48  
49 236 coordination of services among all partners; and 4) education and self-management support for patients  
50  
51 237 and families.  
52  
53  
54

55 238  
56  
57  
58  
59  
60



1  
2  
3 239 1. Evaluation of patient needs and preferences  
4

5 240 The identification of patients who are in need of intervention and who stand to benefit the most from  
6  
7 241 CM is an essential first step (27, 28), ideally executed by an interdisciplinary team (5, 40). Patients are  
8  
9 242 identified by searching administrative data or clinical records in addition to their referral for the CM  
10  
11 243 intervention by primary care professionals. This approach combines clinician judgement with objective  
12  
13 244 data from electronic medical record (EMR) or administrative databases (2, 41). The CM intervention  
14  
15 245 targets patients who present with at least one chronic illness, including mental illness, who frequently  
16  
17 246 use health services as determined by 4 or more emergency department visits or hospitalizations in the  
18  
19 247 previous 12 months, and who have complex needs as determined by the care team. Once a patient has  
20  
21 248 been identified for inclusion in the CM intervention, the case manager examines the patient's medical  
22  
23 249 records going back 12 months in order to understand the reasons for the frequent use of services. The  
24  
25 250 case manager identifies the patient's physical and/or mental illnesses as well as social challenges such as  
26  
27 251 insecure housing or employment, poverty, violence, substance use disorders, etc. The case manager also  
28  
29 252 documents the health and social services previously provided to the patient, as well as the names, roles  
30  
31 253 and contact information of professionals currently involved with the patient or who may eventually be  
32  
33 254 called upon to participate in the care of the patient.  
34  
35  
36  
37  
38

39 255  
40  
41 256 The case manager validates with the patient the information collected from the medical records and  
42  
43 257 determines the patient's personal needs and preferences for future services and resources. This step  
44  
45 258 constitutes the first in-depth interaction between the case manager and the patient, and is essential for  
46  
47 259 building mutual trust and respect (21), for establishing a patient-centered care process, and for  
48  
49 260 encouraging the commitment of the patient as a partner in the care process (42, 43). The patient may  
50  
51 261 prefer to be accompanied by a caregiver or advocate with lived experience of the patient's health  
52  
53 262 situation who can assist in navigating the health and social services system (44). When referring to "the  
54  
55  
56  
57  
58  
59  
60

1  
2  
3 263 patient” in this article, we also refer to an individual who may stand in for the patient at any point  
4  
5 264 during the intervention. Finally, the case manager seeks the patient’s consent to communicate with  
6  
7 265 potential care professionals throughout the intervention and ensures that the patient understands and  
8  
9 266 agrees to the next step of the intervention: the creation of an Individualized Services Plan (ISP). The ISP  
10  
11 267 is a tool for planning and coordinating tailored services intended to give meaning and direction to the  
12  
13 268 patient in consideration of his or her life goals (45), personal environment, resources and culture, in  
14  
15 269 collaboration with a multidisciplinary team of professionals (46) and health and social services  
16  
17 270 organizations.  
18  
19  
20

21 271

## 22 23 272 2. Co-development and maintenance of a patient-centered ISP

24  
25 273 The ISP for patients with chronic conditions may lead to improvements in physical and psychological  
26  
27 274 health, as well as in their ability to self-manage their condition (46-48). It is among the most commonly  
28  
29 275 used strategies in CM interventions (10, 11). The case manager identifies resources available in the local  
30  
31 276 health and social services network and within the community that may be appropriate for the patient.  
32  
33 277 This involves a holistic analysis of the patient’s situation and the identification of clinical-administrative  
34  
35 278 issues and a final list of care professionals that will be invited to examine the patient’s situation. These  
36  
37 279 may be health care and social services professionals, managers or representatives of community  
38  
39 280 organizations. The case manager communicates directly with targeted care professionals to request  
40  
41 281 their involvement, to ensure that the reason for the intervention is understood and to agree upon a  
42  
43 282 mutually convenient date, time and place for an ISP meeting with the patient. The case manager  
44  
45 283 prepares the agenda for the ISP meeting and communicates with the patient to reconfirm consent  
46  
47 284 regarding the professionals who will participate in the meeting and to maintain a relationship of trust  
48  
49 285 and transparency with the patient. The ISP meeting is ideally held in-person, but may be done by phone  
50  
51 286 or online.  
52  
53  
54  
55  
56  
57  
58  
59  
60

1  
2  
3 287  
4  
5 288 At the beginning of the ISP meeting, the care team reviews the potential resources and services that  
6  
7 289 may be proposed to the patient prior to the patient's arrival. This allows the care team to collaboratively  
8  
9 290 examine the patient's situation, needs and preferences and to mobilize their multidisciplinary  
10  
11 291 perspectives (46). The ISP is then developed with the patient and their advocate upon their arrival. The  
12  
13 292 ISP includes a maximum of 3 or 4 objectives in line with the patient's overall expectations and life  
14  
15 293 project (49). The group proposes preferred methods of communication and strategies for exchanging  
16  
17 294 information for the duration of the intervention. The case manager writes up the ISP in plain language  
18  
19 295 and validates that the patient understands and agrees to it.  
20  
21  
22  
23  
24

### 25 297 3. Coordination of services among all partners

26  
27  
28 298 Patients with chronic illnesses and complex care needs are often cared for by multiple providers in  
29  
30 299 various locations and experience difficulty navigating the health system and other resources resulting  
31  
32 300 in unmet needs, a lower quality of life and higher mortality rates (48). A coordinated response by care  
33  
34 301 providers that promotes patient empowerment over an extended period of time is recommended (14).  
35  
36 302 In this intervention, the case manager transmits a copy of the written ISP to the patient and the care  
37  
38 303 team and follows-up regularly with the patient's primary care providers in the clinical setting, ensuring  
39  
40 304 active engagement and direct communication. As the principal contact-person and advocate for the  
41  
42 305 patient, the case manager establishes contact with the services or resources identified in the ISP,  
43  
44 306 providing a personalized reference for the patient, explaining the case and informing care professionals  
45  
46 307 of past and potential challenges facing the patient.  
47  
48  
49

50 308  
51  
52 309 Regular communication and follow-up encourages the patient's active engagement in the intervention,  
53  
54 310 a strategy that has been shown to reduce future use of emergency services (26, 50, 51). The case  
55  
56  
57  
58  
59  
60

1  
2  
3 311 manager talks to the patient about their preferred method for reaching the case manager and other  
4  
5 312 relevant services. Adherence to the ISP throughout the intervention is ensured by maintaining contact  
6  
7 313 with the care professionals involved with each patient, and by verifying if the patient's goals have been  
8  
9 314 attained. The ISP should be reviewed at least once every 3 months. If the patient desires a change in  
10  
11 315 their ISP, or if a care professional identifies any issues throughout the intervention, the case manager  
12  
13 316 reassesses the situation with the patient and adjusts the ISP as necessary.  
14  
15  
16  
17  
18

#### 19 318 4. Education and self-management support for patients and families

20  
21 319 Self-management support was found to be the strategy most frequently associated with health  
22  
23 320 improvements in patients with chronic diseases in a primary care setting (17). Education and self-  
24  
25 321 management support activities aim to increase the patient's skills, confidence and motivation to control  
26  
27 322 and manage their symptoms and to follow their ISP with structured support for problem solving and  
28  
29 323 continuous assessment of the patient's objectives and progress (52). This component of the intervention  
30  
31 324 is considered an ongoing and transversal process to be performed as needed throughout the  
32  
33 325 intervention.  
34  
35  
36  
37  
38

39 327 Case managers aim to develop the patient's ability to monitor their condition, take appropriate action  
40  
41 328 and identify when and how to ask for professional help by assessing the patient's knowledge and  
42  
43 329 learning needs and suggesting beneficial activities, such as journaling symptoms and vitals, and  
44  
45 330 informational resources based on the patient's unique situation. Case managers are trained in  
46  
47 331 motivational interviewing, a "client-centered, directive communication method aimed at changing  
48  
49 332 behavior" (53). The case manager supports the patient to set realistic goals through a "smart" action  
50  
51 333 plan that includes specific behavioral goals that are measurable and attractive to the patient, that may  
52  
53 334 be accomplished in a realistic time frame and that build on previous positive experiences. The case  
54  
55  
56  
57  
58  
59  
60

1  
2  
3 335 manager helps the patient prepare for meetings with the various care professionals to ensure that the  
4  
5 336 patient is empowered to communicate his or her goals and to receive the desired care. Patients are  
6  
7 337 coached on how to effectively communicate with their relatives, to establish expectations, and to  
8  
9 338 ensure a successful care partnership.

#### 11 339 *Study setting*

12 340 The CM intervention will be implemented in ten primary care clinics, each representing a unique case.  
13  
14 341 Two clinics were selected from each of the five participating Canadian provinces of Newfoundland, Nova  
15  
16 342 Scotia, New Brunswick, Québec and Saskatchewan using a purposeful sampling strategy (54). Clinics  
17  
18 343 were selected that had not previously implemented CM and that were interested in implementing the  
19  
20 344 CM intervention and participating in the research project. The interest of a health care professional, a  
21  
22 345 nurse or a social worker, to develop the role of the case manager and to be available to dedicate  
23  
24 346 approximately 1 day per week to the study was essential. The case manager was required to have  
25  
26 347 primary care experience and was offered training in the intervention and continuous support and  
27  
28 348 follow-up through the establishment of a community of practice.  
29  
30  
31  
32  
33

34 349

#### 35 350 *Patient and public involvement*

36  
37 351 Patient partners were involved in this research since its inception, including the design of the research  
38  
39 352 questions and the development of this protocol of which they are coauthors (VS and MW). They  
40  
41 353 continue to provide their expertise regarding study feasibility and acceptability. They will be involved in  
42  
43 354 the interpretation of data and in the dissemination of results.  
44  
45  
46  
47

48 355

#### 49 356 *Timeline*

1  
2  
3 357 The implementation of the CM intervention will take place over a period of one year. A cohort of  
4  
5 358 patients will be recruited at each clinic and will be administered the intervention over the course of 12  
6  
7 359 months.  
8  
9

10 360

11  
12 361 *Patient recruitment*  
13

14 362 Each clinic will identify 30 patients for enrolment in the CM intervention, for a total of 300 patients  
15  
16 363 across the 5 participating provinces. Patients are selected who are most likely to benefit from CM, based  
17  
18 364 on the clinical judgement of the case manager and the family physician. Criteria for inclusion in the  
19  
20 365 study are as follows: 1) living with at least one chronic physical or mental illness; 2) frequent user of  
21  
22 366 health care services ie. having 4 or more hospitalizations or visits to the emergency department in the  
23  
24 367 previous year; 3) having complex care needs as determined by the care team. Patients who are ineligible  
25  
26 368 for participation in the study include individuals whose prognosis is less than one year or who are  
27  
28 369 exhibiting a loss of autonomy.  
29

30 370

31  
32 371 *Study design*  
33  
34

35  
36 372 The implementation analysis is designed as a multiple-case embedded study, where each of the ten  
37  
38 373 clinics will represent one sub-unit of analysis. This design is best-suited to analyzing complex  
39  
40 374 interventions implemented in variable and dynamic settings, and where the underlying context is  
41  
42 375 difficult to isolate from the intervention itself (55). This design allows several levels of analysis, the  
43  
44 376 observation of various organizational processes or behaviours, the examination of the context and  
45  
46 377 process of implementation, and the interaction among involved stakeholders (56). It also favors the use  
47  
48 378 of mixed methods of data collection and analysis (57).  
49

50 379

51  
52 380 *Data collection*  
53  
54  
55  
56  
57  
58  
59  
60

1  
2  
3 381 To accomplish the objectives of this research, a mixed methods data collection is planned. Multiple  
4  
5 382 sources of information will be used to collect both qualitative and quantitative data.  
6  
7  
8 383

9  
10 384 **Individual semi-structured interviews** will be administered to all case managers (1-2 per clinic) and  
11  
12 385 clinic managers (1 per clinic) at each study site at the start of the intervention (T0), and at the end of the  
13  
14 386 intervention (T12 months). At the end of the intervention (T12 months), 10 patients and/or their  
15  
16 387 representative will also be interviewed. Patients will be purposefully selected to achieve maximum  
17  
18 388 variation (54). A total of 130 individual semi-structured interviews will be administered across the 10  
19  
20 389 participating clinical sites. An interview guide was developed composed of 18 open-ended questions  
21  
22 390 based on the constructs of the conceptual model (Figure 1). The first part of the interview will address  
23  
24 391 the clinical context of the CM intervention, the services offered at each clinical site to patients with  
25  
26 392 chronic conditions and complex care needs, and the way in which the clinic works with other health and  
27  
28 393 social services organizations. In the second part of the interview, questions will be asked about the  
29  
30 394 implementation of the four components CM intervention, the context of implementation, the barriers  
31  
32 395 and facilitators to intervention, and about individual perceptions and attitudes towards the intervention.  
33  
34  
35  
36  
37  
38

### 39 **Focus groups**

40  
41 398 A focus group discussion will be held at each participating clinic, once at the beginning of the  
42  
43 399 intervention (T0) and once at T9-12 months, for a total of 20 focus groups throughout the CM  
44  
45 400 intervention. Primary care providers, including physicians, nurses, social workers, pharmacists and any  
46  
47 401 health and social services professionals involved in the intervention will be invited to take part in a  
48  
49 402 discussion facilitated by a member of the PriCare research team. The interview guide described above  
50  
51 403 for the semi-structured interviews will be adapted and used to guide the focus group discussion.  
52  
53  
54  
55  
56  
57  
58  
59  
60

1  
2  
3 405 **Non-participant observation**  
4

5 406 The activities of the intervention at each of the ten clinical sites will be observed for thirty-six hours  
6  
7 407 during the implementation year. A member of the PriCare research team will observe the CM activities  
8  
9  
10 408 including the meetings between the patient and the case manager, the development of the ISP,  
11  
12 409 meetings between the primary care professionals, and any other activities adopted by the clinic under  
13  
14 410 observation. Data collection will be guided by means of an observation grid developed to reflect the four  
15  
16 411 components of the CM intervention and the constructs of the conceptual framework.  
17  
18

19 412

20  
21 413 **Clinical data on services use**  
22

23 414 Quantitative data from patient medical records will be collected at the beginning (T0) of the  
24  
25 415 intervention for a period of 12 months, before the patient's first visit with the case manager, and at the  
26  
27 416 end of the intervention 12 months) (N=300). The purpose of this data collection is to compare the  
28  
29 417 utilization of services in the year before the intervention with utilization during the intervention. Data  
30  
31 418 will include the number of emergency department visits, overnight stays in the hospital and primary  
32  
33 419 care professional visits. Patient expenditures from these activities will be calculated using an established  
34  
35 420 fee schedule from the Canadian Institute of Health Information (CIHI) patient cost estimator (58). The  
36  
37 421 cost of the intervention will be measured by tracking expenditures related to the CM activities.  
38  
39  
40

41 422

42  
43 423 **Patient self-administered questionnaires**  
44

45 424 Participating patients (N=300) will be asked to complete a 30-minute questionnaire at baseline (T0), at  
46  
47 425 the halfway point (T6 months) and at the end of the intervention (T12 months) under the guidance of a  
48  
49 426 member of the PriCare research team. Questionnaires are available in both English and French and have  
50  
51 427 been validated. Data collected will include age, gender, marital status, education, occupation, economic  
52  
53 428 status with family income and patient perception of his or her economic situation, health literacy,  
54  
55  
56  
57  
58  
59  
60



1  
2  
3 429 multimorbidity, care integration, self-management and quality of life. Health literacy will be measured  
4  
5 430 using Chew's 3 questions for screening patients with inadequate or marginal health literacy (59, 60),  
6  
7 431 multimorbidity with the Disease Burden Morbidity Assessment (21 items) (61, 62), care integration with  
8  
9 432 the Picker Institute Questionnaire (13 items) (63), self-management with the Partners in Health Scale (12  
10  
11 433 items) (64, 65), quality of life with the SF-12v2 (12 items) (66) , quality-adjusted life years (QALY) derived  
12  
13 434 from the SF-12v2 (67) and psychological distress with Kesslers' 6 questions regarding a person's  
14  
15 435 emotional state (68).  
16  
17  
18  
19 436

### 21 437 **Intervention fidelity evaluation**

22  
23 438 The degree to which an intervention is delivered as intended is critical to the attainment of expected  
24  
25 439 outcomes (69, 70). Referred to as intervention fidelity, the delivery and the degree of adherence to the  
26  
27 440 four main components of the intervention will be assessed based on the qualitative and quantitative  
28  
29 441 data collected by a member of the PriCare research team during the intervention year. A fidelity grid  
30  
31 442 was developed using the Carroll et al. (2007) conceptual framework for implementation fidelity (71). In  
32  
33 443 addition to identifying the essential components of the intervention as described previously, adherence  
34  
35 444 to the content, frequency, duration and coverage of the intervention as described in this protocol, as  
36  
37 445 well as the moderating factors that may influence implementation such as intervention complexity, the  
38  
39 446 facilitation strategies used, the quality of intervention delivery, and the responsiveness of participants  
40  
41 447 will be documented (71). The fidelity grid guides the data collection via a series of general questions  
42  
43 448 referring to each element of (71) conceptual framework, identifies primary and secondary sources of  
44  
45 449 data and specifies the data collection method for each element of the conceptual framework.  
46  
47  
48  
49

50 450

51  
52 451 *Outcome variables*  
53  
54  
55  
56  
57  
58  
59  
60

1  
2  
3 452 As described in the conceptual model (Figure 1), the main outcomes of the intervention that will be  
4  
5 453 examined are based on the quadruple aims to optimize health system performance: *improved patient-*  
6  
7 454 *reported outcomes, health care use, cost effectiveness and care team well-being* (34). Self-management  
9  
10 455 and quality of life are the main patient-reported outcomes collected from the patient-administered  
11  
12 456 questionnaire at baseline and at the end of the intervention (T12 months). Health care use will be based  
13  
14 457 on the clinical data collected on services use including the number of emergency department visits,  
15  
16 458 overnight hospital stays and primary care professional visits. It will also be based on health services  
18  
19 459 integration, assessed within the patient-administered questionnaire. Care team well-being will be  
20  
21 460 evaluated from the data collected from the individual semi-structured interviews and focus group  
22  
23 461 discussions with health care professionals. Finally, cost effectiveness will be based on the CIHI cost  
24  
25 462 estimator, as previously described.

26  
27  
28 46330 464 *Analysis*

31  
32 465 A combination of analytical strategies will be used to reflect the variability and dynamic nature of  
33  
34 466 context analysis and the mixed methods approach as used in this research (55, 57, 72). First, qualitative  
35  
36 467 and quantitative data collected will be integrated through a comparison of results for similarities and  
37  
38 468 differences throughout the analysis phase (72). Second, qualitative and quantitative data will be  
39  
40 469 compared for variables measured in several ways such as health services utilization, self-management,  
41  
42 470 quality of life and care integration (73). Third, qualitative and quantitative data will be merged for each  
43  
44 471 of the 10 cases (the participating clinical sites). A case history will be reported for each clinical site that  
45  
46 472 will constitute the synthesis of the merged data. Fourth, a comparison of the cases will be completed  
47  
48 473 using a mixed methods matrix (54). All categories of stakeholders involved in this research including the  
49  
50 474 principal investigators, research assistants, patient partners, clinical experts, technical and scientific  
51  
52 475 experts and policy makers, will be called upon to participate in the data analysis to ensure valid and  
53  
54  
55  
56  
57  
58  
59  
60

1  
2  
3 476 meaningful interpretations. Additional analytical techniques for case study research (55) will be used as  
4  
5 477 detailed below.  
6

7  
8 478

9  
10 479 Objective 1

11  
12 480 To identify the barriers and the facilitators to implementation of the CM intervention in different  
13  
14 481 primary care contexts, the qualitative data collected using individual semi-structured interviews, focus  
15  
16 482 groups and non-participant observation will be analyzed. Responses to questions regarding the  
17  
18 483 perceived barriers and facilitators to responding to the needs of patients with chronic conditions and  
19  
20 484 complex care needs, to working with internal clinic partners and external health and social services  
21  
22 485 partners to care for this patient population, and to the process of implementing the four main  
23  
24 486 components of the CM intervention will be extracted and analyzed. Information regarding the perceived  
25  
26 487 complexity of the intervention, ease of implementation, care professional engagement and satisfaction  
27  
28 488 with the intervention, and available support strategies to facilitate implementation will be extracted  
29  
30 489 from the data collection grid used for the non-participant observation and for the fidelity evaluation.  
31  
32  
33

34 490

35  
36  
37 491 Objective 2

38  
39 492 A similar approach will be taken to explain the influence of the context of implementation on the degree  
40  
41 493 of implementation. Interviewees and participants in the focus group discussions will be asked specific  
42  
43 494 questions regarding the local clinical context, the workplace environment, relationships with external  
44  
45 495 health and social services partners, individual attitudes and perceptions to the intervention and the  
46  
47 496 overall process of implementation of the CM intervention. This information will be extracted and  
48  
49 497 compared to the results of the fidelity evaluation to assess the degree of implementation of the  
50  
51 498 intervention.  
52  
53

54  
55 499

1  
2  
3 500 A mixed thematic analysis approach will be used (54). Each of the ten clinical sites will be analyzed  
4  
5 501 separately as an individual case study using a deductive approach based on the conceptual model  
6  
7 502 (Figure 1), as well as an inductive approach based on emergent constructs. A case history will be  
8  
9  
10 503 reported, guided by the constructs of the conceptual model (Figure 1). Subsequent to individual analysis  
11  
12 504 of the ten cases, a comparison between the cases will be performed using a descriptive and  
13  
14 505 interpretative matrix (54). This approach allows systematic comparison among cases and among units of  
15  
16 506 analysis. Analytical techniques specific to case study research will be used as described in (55) including  
17  
18 507 pattern comparison, research of competing explanations and construction of explanations. Qualitative  
19  
20  
21 508 data will be managed using multisite NVivo 12 server software (QSR International Pty Ltd).  
22

23 509

### 24 25 510 Objective 3

26  
27  
28 511 To evaluate the influence of the context of implementation on the outcomes of the intervention, clinical  
29  
30 512 data on services use and quantitative data extracted from the patient self-administered questionnaires  
31  
32 513 will be analyzed using descriptive statistics. Quantitative data will be analyzed first and then interpreted  
33  
34 514 in integration with qualitative data and the intervention fidelity evaluation described above, rather than  
35  
36 515 trying to calculate non-biased quantitative effects (73). Regression models will be developed to evaluate  
37  
38 516 the relationships between intervention fidelity, patient characteristics, the constructs of the conceptual  
39  
40  
41 517 model reflecting the contextual elements of the intervention, and the outcomes of the intervention. This  
42  
43 518 will be done using SPSS version 26. An incremental cost-effectiveness/utility ratio (ICER or ICUR) (74) will  
44  
45 519 be calculated using data collected on costs and quality-adjusted life years (QALY) before and after  
46  
47  
48 520 implementation of the CM intervention. Multivariate parametric analyses with bootstrap replications  
49  
50 521 will be conducted together with cost-effectiveness acceptability curves (CEAC) (75).  
51

52 522

### 53 54 523 **Discussion**

1  
2  
3 524 CM is a promising approach to delivering care to patients with chronic illnesses and complex care needs,  
4  
5 525 but little is known about its implementation in a primary care setting (21). As an intervention composed  
6  
7 526 of multiple components and steps that will be implemented in multiple sites, CM is an example of a  
8  
9  
10 527 complex, context-dependent intervention (76). Identifying and analyzing the contextual determinants  
11  
12 528 across a variety of sites is necessary to understand how the intervention can produce its intended  
13  
14 529 outcomes (77). An implementation analysis achieves a deeper understanding of the conditions that are  
15  
16 530 most likely to lead to the successful implementation of the core components of the intervention (56). It  
17  
18 531 serves to identify variation in outcomes associated with different contexts and to identify  
19  
20 532 implementation problems (73). An implementation analysis can reveal how an intervention causes  
21  
22 533 change in a particular context and highlights an intervention's strengths and weaknesses in relation to  
23  
24 534 intended outcomes (56).

25  
26  
27  
28 535  
29  
30 536 This research will detail the steps involved in implementing the four main components of the CM  
31  
32 537 intervention at different clinical sites and will identify barriers and facilitators to implementation,  
33  
34 538 providing the opportunity to address potential problems and to refine the intervention. This context of  
35  
36 539 implementation which will be further understood through a detailed, theoretically-based approach to  
37  
38 540 the identification and analysis of the macro, meso and micro level determinants of implementation (18,  
39  
40 541 32). The implementation process will be studied, highlighting the development and change across time  
41  
42 542 of the steps required to implement the intervention in various contexts. This research will respond to  
43  
44 543 some of the most important issues raised in recent publications on CM for frequent users of health care  
45  
46 544 services with chronic illnesses and complex care needs (21, 23, 24, 26) , by contributing to the  
47  
48 545 understanding of how to implement this intervention in different primary care contexts in a cost-  
49  
50 546 effective way that improves patient reported outcomes and health care use, while ensuring the well-  
51  
52  
53  
54 547 being of the care team.

1  
2  
3 548  
4  
5 549 The multi-level conceptual framework proposed in this study may be helpful for future research because  
6  
7  
8 550 it combines the approach to analyzing the effective implementation of health care interventions, with  
9  
10 551 the principles of the integrative functions of primary care. The resulting framework supports the analysis  
11  
12 552 of effective implementation not only of CM, but also of primary care interventions aiming to achieve  
13  
14 553 care integration. The framework reflects the importance of intersectorial linkages and ensures the  
15  
16 554 incorporation of constructs aimed to improve access, quality and continuity of services for patients with  
17  
18 555 complex needs (18), regardless of the intervention being implemented. It is also particularly suited to  
19  
20  
21 556 the analysis and formative evaluation of complex, multi-level interventions in health care, verifying what  
22  
23 557 works where and why across multiple contexts (32). The conceptual framework represents how patient,  
24  
25 558 organizational and systems-level elements of implementation, the dynamic, time-dependent process of  
26  
27 559 implementation, and the defining features of primary care, can translate into meaningful intervention  
28  
29 560 outcomes, based on the quadruple aims to optimize health system performance. The framework can  
30  
31 561 inform the effective implementation of complex primary care interventions that seek to facilitate the  
32  
33 562 continuous, comprehensive and coordinated delivery of services to individuals or populations, and that  
34  
35 563 necessitate the engagement of multiple stakeholders across various sectors.  
36  
37  
38  
39 564

40  
41 565 The use of “multi-strategy” or “multi-faceted” frameworks to describe and analyze the implementation  
42  
43 566 of complex interventions increases the precision and specificity of reporting, which facilitates effective  
44  
45 567 evaluation and replication (78, 79). The proposed research fulfills an essential step towards replication  
46  
47 568 and scalability of CM by identifying the implementation strategies that support the adoption, scale-up  
48  
49 569 and replication of best practices in CM (78, 80). Given the complex nature of the CM intervention,  
50  
51 570 practitioners report challenges to implementation, especially considering the lack of guidelines or a  
52  
53 571 blueprint on how to operationalize its core components across different settings (81). Implementation is  
54  
55  
56  
57  
58  
59  
60

1  
2  
3 572 often poorly reported in published literature, which presents a challenge to both research and practice  
4  
5 573 and impedes replication and immediate adoption in a clinical setting (79, 82). To achieve wide-scale  
6  
7 574 adoption and replication, the CM intervention must be tailored to the local context in an approach that  
8  
9 575 considers the individual, the team of professionals, the organizational setting and the greater system  
10  
11 576 (81). Few studies have described, categorized and analyzed intervention implementation in a  
12  
13 577 contextually tailored approach (82). This research will thus provide this information for both researchers  
14  
15 578 and practitioners, which according to our knowledge, has not yet been done.  
16  
17  
18  
19  
20

579

### 580 **Study validity**

21  
22  
23 581 Construct validity is ensured through a detailed conceptual model and consistency in the application of  
24  
25 582 its constructs in the data collection and analysis. Internal validity is ensured through a systematic coding  
26  
27 583 and rigorous organization of collected data and the triangulation of several sources of qualitative data  
28  
29 584 acquired from different participating stakeholders including patients, case managers, clinic managers,  
30  
31 585 researchers, clinicians and informal caregivers (55). Analysis and comparison of different case studies in  
32  
33 586 various implementation contexts will reinforce external validity and transferability. The observation and  
34  
35 587 analysis of multiple levels, and their replication across several cases enhances both internal and external  
36  
37 588 validity (55).  
38  
39  
40

589

### 590 **Figure Legend**

41  
42  
43  
44 591 Figure 1: Conceptual model for the implementation analysis of a case management intervention  
45  
46  
47  
48 592

593

### 594 **List of Abbreviations**

49  
50  
51 595 CEAC: Cost-effectiveness acceptability curves  
52  
53  
54

55 596 CFIR: Consolidated framework for implementation research  
56  
57  
58  
59  
60

1  
2  
3 596 CIHI: Canadian Institute of Health Information  
4

5 597 CIHR: Canadian Institutes for Health Research  
6

7 598 CCM: Chronic care model  
8

9 599 CM: Case management  
10

11 600 EMR: Electronic medical record  
12

13 601 ICER: Incremental cost-effectiveness ratio  
14

15 602 ICUR: Incremental cost-utility ratio  
16

17 603 ISP: Individualized services plan  
18

19 604 QALY: Quality-adjusted life years  
20

21 605  
22

23  
24  
25 606 **Declarations**  
26

27  
28 607 The funders played no role in designing the study, neither did they in data collection, analysis and  
29  
30 608 interpretation or in the writing of the manuscript.  
31

32 609 **Ethics approval**  
33

34 610 This project received approval from the CIUSSS de l'Estrie – CHUS Research Ethic Board (project number  
35  
36 611 MP-31-2019-2830).  
37

38  
39 612 **Dissemination plan**  
40

41 613 Patients and family partners, clinicians, policy makers and researchers have formed a steering  
42  
43 614 committee to collaborate in planning and executing this research process. A knowledge translation plan  
44  
45 615 has been developed with the goals of increasing awareness and bringing change to practice, policy and  
46  
47 616 future research. Dissemination goals are determined by each stakeholder group and executed by a  
48  
49 617 group representative. Dissemination methods include news releases in social media and local/provincial  
50  
51 618 media outlets, executive-summary reports to clinician audiences, presentations at meetings of Canadian  
52  
53  
54  
55  
56  
57  
58  
59  
60



1  
2  
3 619 professional associations (for family physicians, nurses and social workers), conference presentations at  
4  
5 620 annual international meetings of the NAPCRG and the CAHSPR, and articles in peer-reviewed journals.  
6

7  
8 **621 Consent for publication**

9  
10 622 This manuscript does not contain any individual person's data in any form.  
11

12 **623 Availability of data and materials**

13  
14 624 Not applicable.  
15

16 **625 Competing interests**

17  
18 626 None declared.  
19  
20

21 **627 Funding**

22  
23 628 This work is supported by the Canadian Institutes of Health Research (CIHR) – Operating Grant: SPOR  
24  
25 629 PIHCI Network: Programmatic Grants (grant number 397896) and other partners such as Axe santé-  
26  
27 630 Population, organisations et pratiques du CRCHUS, Centre de recherche du CHUS, Département de  
28  
29 631 médecine de famille et médecine d'urgence (Université de Sherbrooke), Fondation de l'Université de  
30  
31 632 Sherbrooke, Fondation de Ma Vie, Fonds de recherche du Québec en santé, Institut universitaire de  
32  
33 633 première ligne en santé et services sociaux, Ministère de la santé et des services sociaux du Québec,  
34  
35 634 New Brunswick Health Research Foundation, Nova Scotia Health Authority, Faculty of Medicine of  
36  
37 635 Dalhousie University and Dalhousie Medical Research Foundation, Réseau-1 Québec, Saskatchewan  
38  
39 636 Health Research Foundation and Université de Sherbrooke and Université du Québec à Chicoutimi.  
40  
41  
42  
43

44 637

45  
46 **638 Author Contributions**

47  
48 639 AD: conception and design of the work; acquisition, analysis and interpretation of data; drafting and  
49  
50 640 substantial revisions to the manuscript; MCC: conception of work; analysis and interpretation of data;  
51  
52 641 substantial revision to the manuscript; KAB: conception of work; analysis and interpretation of data;  
53  
54 642 substantial revision to the manuscript; FB: conception of work; analysis and interpretation of data;  
55  
56  
57  
58  
59  
60

1  
2  
3 643 substantial revision to the manuscript; SD: conception of work; analysis and interpretation of data;  
4  
5 644 substantial revision to the manuscript; VR: conception of work; analysis and interpretation of data;  
6  
7 645 substantial revision to the manuscript; MB: analysis and interpretation of data; substantial revision to  
8  
9  
10 646 the manuscript; MC: analysis and interpretation of data; substantial revision to the manuscript;  
11  
12 647 BC: analysis and interpretation of data; substantial revision to the manuscript; ML: analysis and  
13  
14 648 interpretation of data; substantial revision to the manuscript; CP: analysis and interpretation of data;  
15  
16 649 substantial revision to the manuscript; VS: analysis and interpretation of data; substantial revision to the  
17  
18  
19 650 manuscript; MW: analysis and interpretation of data; substantial revision to the manuscript;  
20  
21 651 CH: conception and design of the work; acquisition, analysis and interpretation of data; substantial  
22  
23 652 revisions to the manuscript; guarantor of the manuscript. All authors approved the final manuscript and  
24  
25 653 agree to be responsible for all aspects of the work.  
26  
27  
28 654

### 655 **Acknowledgements**

656 The authors would like to thank the PriCare research group and collaborators for their coordination and  
657 methodological support: PL Bush, Y Couturier, L Guénette, A Luke, P Morin, P Pluye, TG Poder, ME  
658 Poitras, P Roberge, R Valaitis, V, C Longjohn, C Spence, J Porter, D Rubenstein, R Stoddard, S Bighead, C  
659 Campbell, L Edwards, P Gauthier, R Gibson, J Labbé, F Dubé, DA Roy, T Sampalli, J Young, M Brodeur, B  
660 Davis, S Gander, J Godbout, N Rabbitskin, J Splane, F Lemire, A Rondeau, N Senn, E Shadmi, and the  
661 PriCare research team.  
662

### 663 **References**

- 664 1. Chouinard MC, Hudon C, Dubois MF, Roberge P, Loignon C, Tchouaket E, et al. Case  
665 management and self-management support for frequent users with chronic disease in primary care: a  
666 pragmatic randomized controlled trial. *BMC Health Serv Res.* 2013;13:49.
- 667 2. Hudon C, Chouinard MC, Aubrey-Bassler K, Burge F, Doucet S, Ramsden VR, et al. Case  
668 management in primary care for frequent users of healthcare services with chronic diseases and

- 1  
2  
3 669 complex care needs: an implementation and realist evaluation protocol. *BMJ Open*.  
4 670 2018;8(11):e026433.
- 5 671 3. Hunt KA, Weber EJ, Showstack JA, Colby DC, Callaham ML. Characteristics of frequent users of  
6 672 emergency departments. *Ann Emerg Med*. 2006;48(1):1-8.
- 7 673 4. Lee KH, Davenport L. Can case management interventions reduce the number of emergency  
8 674 department visits by frequent users? *Health Care Manag*. 2006;25(2):155-9.
- 9 675 5. Mandelberg JH, Kuhn RE, Kohn MA. Epidemiologic analysis of an urban, public emergency  
10 676 department's frequent users. *Acad Emerg Med*. 2000;7(6):637-46.
- 11 677 6. Pope D, Fernandes CM, Bouthillette F, Etherington J. Frequent users of the emergency  
12 678 department: a program to improve care and reduce visits. *CMAJ*. 2000;162(7):1017-20.
- 13 679 7. Reinius P, Johansson M, Fjellner A, Werr J, Ohlen G, Edgren G. A telephone-based case-  
14 680 management intervention reduces healthcare utilization for frequent emergency department visitors.  
15 681 *Eur J Emerg Med*. 2013;20(5):327-34.
- 16 682 8. Clarke LH, Bennett EV. Constructing the moral body: self-care among older adults with multiple  
17 683 chronic conditions. *Health (N Y)*. 2013;17(3):211-28.
- 18 684 9. Rinke ML, Dietrich E, Kodeck T, Westcoat K. Operation care: a pilot case management  
19 685 intervention for frequent emergency medical system users. *Am J Emerg Med*. 2012;30(2):352-7.
- 20 686 10. Joo JY, Liu MF. Case management effectiveness in reducing hospital use: a systematic review. *Int*  
21 687 *Nurs Rev*. 2017;64(2):296-308.
- 22 688 11. Soril LJ, Leggett LE, Lorenzetti DL, Noseworthy TW, Clement FM. Reducing frequent visits to the  
23 689 emergency department: a systematic review of interventions. *PLoS One*. 2015;10(4):e0123660.
- 24 690 12. Moe J, Kirkland SW, Rawe E, Ospina MB, Vandermeer B, Campbell S, et al. Effectiveness of  
25 691 Interventions to Decrease Emergency Department Visits by Adult Frequent Users: A Systematic Review.  
26 692 *Acad Emerg Med*. 2017;24(1):40-52.
- 27 693 13. Shumway M, Boccellari A, O'Brien K, Okin RL. Cost-effectiveness of clinical case management for  
28 694 ED frequent users: results of a randomized trial. *Am J Emerg Med*. 2008;26(2):155-64.
- 29 695 14. European Observatory on Health Systems and Policies Series. Caring for people with chronic  
30 696 conditions: A health system perspective. Berkshire, England: Open University Press; 2008.
- 31 697 15. Wagner EH. Chronic disease management: what will it take to improve care for chronic illness?  
32 698 *Eff Clin Pract*. 1998;1(1):2-4.
- 33 699 16. World Health Organization. Innovative Care for Chronic Conditions: Building blocks for action.  
34 700 Geneva: World Health Organization; 2002.
- 35 701 17. Reynolds R, Dennis S, Hasan I, Slewa J, Chen W, Tian D, et al. A systematic review of chronic  
36 702 disease management interventions in primary care. *BMC Fam Pract*. 2018;19(1):11.
- 37 703 18. Valentijn PP, Schepman SM, Opheij W, Bruijnzeels MA. Understanding integrated care: a  
38 704 comprehensive conceptual framework based on the integrative functions of primary care. *Int J Integr*  
39 705 *Care*. 2013;13:e010.
- 40 706 19. Phillips GA, Brophy DS, Weiland TJ, Chenhall AJ, Dent AW. The effect of multidisciplinary case  
41 707 management on selected outcomes for frequent attenders at an emergency department. *Med J Aust*.  
42 708 2006;184(12):602-6.
- 43 709 20. Leutz WN. Five laws for integrating medical and social services: lessons from the United States  
44 710 and the United Kingdom. *Milbank Q*. 1999;77(1):77-110, iv-v.
- 45 711 21. Hudon C, Chouinard MC, Aubrey-Bassler K, Muhajarine N, Burge F, Pluye P, et al. Case  
46 712 management in primary care among frequent users of healthcare services with chronic conditions:  
47 713 protocol of a realist synthesis. *BMJ Open*. 2017;7(9):e017701.
- 48 714 22. Hudon C, Chouinard MC, Diadiou F, Lambert M, Bouliane D. Case Management in Primary Care  
49 715 for Frequent Users of Health Care Services With Chronic Diseases: A Qualitative Study of Patient and  
50 716 Family Experience. *Ann Fam Med*. 2015;13(6):523-8.

- 1  
2  
3 717 23. Althaus F, Paroz S, Hugli O, Ghali WA, Daeppen JB, Peytremann-Bridevaux I, et al. Effectiveness  
4 718 of interventions targeting frequent users of emergency departments: a systematic review. *Ann Emerg*  
5 719 *Med.* 2011;58(1):41-52 e42.
- 6 720 24. Bodenmann P, Velonaki VS, Griffin JL, Baggio S, Iglesias K, Moschetti K, et al. Case Management  
7 721 may Reduce Emergency Department Frequent use in a Universal Health Coverage System: a Randomized  
8 722 Controlled Trial. *J Gen Intern Med.* 2017;32(5):508-15.
- 9 723 25. National Case Management Network of Canada. Connect, collaborate and communicate the  
10 724 power of case management: Canadian Standards of Practice in Case Management. Canada: National Case  
11 725 Management Network; 2009.
- 12 726 26. Kumar GS, Klein R. Effectiveness of case management strategies in reducing emergency  
13 727 department visits in frequent user patient populations: a systematic review. *J Emerg Med.*  
14 728 2013;44(3):717-29.
- 15 729 27. Edgren G, Anderson J, Dolk A, Torgerson J, Nyberg S, Skau T, et al. A case management  
16 730 intervention targeted to reduce healthcare consumption for frequent Emergency Department visitors:  
17 731 results from an adaptive randomized trial. *Eur J Emerg Med.* 2016;23(5):344-50.
- 18 732 28. Hudon C, Chouinard MC, Pluye P, El Sherif R, Bush PL, Rihoux B, et al. Characteristics of Case  
19 733 Management in Primary Care Associated With Positive Outcomes for Frequent Users of Health Care: A  
20 734 Systematic Review. *Ann Fam Med.* 2019;17(5):448-58.
- 21 735 29. Hudon C, Chouinard MC, Lambert M, Diadiou F, Bouliane D, Beaudin J. Key factors of case  
22 736 management interventions for frequent users of healthcare services: a thematic analysis review. *BMJ*  
23 737 *Open.* 2017;7(10):e017762.
- 24 738 30. Costa PL, Graça AM, Marques-Quinteiro P, Santos CM, Caetano A, Passos AM. Multilevel  
25 739 Research in the Field of Organizational Behavior. *SAGE Open.* 2013;3(3).
- 26 740 31. Rousseau DM, Aguinis H, Boyd BK, Pierce CA, Short JC. Reinforcing the Micro/Macro Bridge:  
27 741 Organizational Thinking and Pluralistic Vehicles. *Journal of Management.* 2010;37(2):429-42.
- 28 742 32. Damschroder LJ, Aron DC, Keith RE, Kirsh SR, Alexander JA, Lowery JC. Fostering implementation  
29 743 of health services research findings into practice: a consolidated framework for advancing  
30 744 implementation science. *Implementation science : IS.* 2009;4:50.
- 31 745 33. The SAGE Handbook of Process Organization Studies. London: SAGE Publications Ltd.; 2016  
32 746 [cited 2020 February 12]. Available from: [http://sk.sagepub.com/reference/the-sage-handbook-of-](http://sk.sagepub.com/reference/the-sage-handbook-of-process-organization-studies)  
33 747 [process-organization-studies](http://sk.sagepub.com/reference/the-sage-handbook-of-process-organization-studies).
- 34 748 34. Bodenheimer T, Sinsky C. From triple to quadruple aim: care of the patient requires care of the  
35 749 provider. *Ann Fam Med.* 2014;12(6):573-6.
- 36 750 35. Case management society of America. What is a case manager? 2019 [cited 2020 February 12].  
37 751 Available from: <https://www.cmsa.org/who-we-are/what-is-a-case-manager/>.
- 38 752 36. Canadian Institutes of Health Research. Strategy for patient-oriented research 2019 [cited 2020  
39 753 February 12]. Available from: <https://cihr-irsc.gc.ca/e/41204.html>.
- 40 754 37. National Collaboration for Integrated Care and Support. Integrated care and support: Our  
41 755 shared commitment. London: NHS; 2019 [cited 2020 February 12].
- 42 756 38. Grover CA, Crawford E, Close RJ. The Efficacy of Case Management on Emergency Department  
43 757 Frequent Users: An Eight-Year Observational Study. *J Emerg Med.* 2016;51(5):595-604.
- 44 758 39. Couturier Y, Gagnon D, Belzile L. La gestion de cas comme intermédiaire du "bien vieillir". Enre  
45 759 autonomisation des usagers et protocolarisation des services aux personnes âgées en perte  
46 760 d'autonomie. *Recherches sociologiques et anthropologiques.* 2013;44(1):117-35.
- 47 761 40. Borges Da Silva R, Brault I, Pineault R, Chouinard MC, Prud'homme A, D'Amour D. Nursing  
48 762 Practice in Primary Care and Patients' Experience of Care. *J Prim Care Community Health.*  
49 763 2018;9:2150131917747186.

- 1  
2  
3 764 41. Freund T, Peters-Klimm F, Rochon J, Mahler C, Gensichen J, Erler A, et al. Primary care practice-  
4 765 based care management for chronically ill patients (PraCMan): study protocol for a cluster randomized  
5 766 controlled trial [ISRCTN56104508]. *Trials*. 2011;12:163.
- 6 767 42. Carreau E, Brière N, Houle N, Dumont S, Maziade J, Paré L, et al., editors. Continuum of  
7 768 interprofessional collaborative practice in health and social care - Guide: Réseau de collaboration sur les  
8 769 pratiques interprofessionnelles en santé et services sociaux (RCPI); 2018.
- 9 770 43. Grinberg C, Hawthorne M, LaNoue M, Brenner J, Mautner D. The Core of Care Management: The  
10 771 Role of Authentic Relationships in Caring for Patients with Frequent Hospitalizations. *Population health*  
11 772 *management*. 2016;19(4):248-56.
- 12 773 44. Manafo E, Petermann L, Mason-Lai P, Vandall-Walker V. Patient engagement in Canada: a  
13 774 scoping review of the 'how' and 'what' of patient engagement in health research. *Health Res Policy Syst*.  
14 775 2018;16(1):5.
- 15 776 45. Rijken M, Struckmann V, van der Heide I, Hujala A, Barbabella F, van Ginneken E, et al. How to  
16 777 improve care for people with multimorbidity in Europe? *Int J Integr Care*. 2016;16(6):A209.
- 17 778 46. Coulter A, Entwistle VA, Eccles A, Ryan S, Shepperd S, Perera R. Personalised care planning for  
18 779 adults with chronic or long-term health conditions. *Cochrane Database Syst Rev*. 2015(3):Cd010523.
- 19 780 47. Sadowski LS, Kee RA, VanderWeele TJ, Buchanan D. Effect of a housing and case management  
20 781 program on emergency department visits and hospitalizations among chronically ill homeless adults: a  
21 782 randomized trial. *JAMA*. 2009;301(17):1771-8.
- 22 783 48. Schoen C, Osborn R, Squires D, Doty M, Pierson R, Applebaum S. New 2011 survey of patients  
23 784 with complex care needs in eleven countries finds that care is often poorly coordinated. *Health Aff*  
24 785 (Millwood). 2011;30(12):2437-48.
- 25 786 49. Rijken M, Van der Heide I, Heijmans M. Individual care plans in chronic illness care: aims, use  
26 787 and outcomes. *International Journal of Integrated Care*. 2016;16(6).
- 27 788 50. Chan BT, Ovens HJ. Frequent users of emergency departments. Do they also use family  
28 789 physicians' services? *Can Fam Physician*. 2002;48:1654-60.
- 29 790 51. Ramos Salazar L. The Effect of Patient Self-Advocacy on Patient Satisfaction: Exploring Self-  
30 791 Compassion as a Mediator. *Communication Studies*. 2018;69(5):567-82.
- 31 792 52. Health Council of Canada. Self-management support for Canadians with chronic health  
32 793 conditions. Canada: Health Council of Canada; 2012 [cited 2020 February 12]. Available from:  
33 794 [https://www.selfmanagementbc.ca/uploads/HCC\\_SelfManagementReport\\_FA.pdf](https://www.selfmanagementbc.ca/uploads/HCC_SelfManagementReport_FA.pdf).
- 34 795 53. Berthiaume P, Fortier D. [Motivational interview]. *Perspective infirmiere : revue officielle de*  
35 796 *l'Ordre des infirmières et infirmiers du Québec*. 2012;9(2):34-7.
- 36 797 54. Miles MB, Huberman AM, Saldana J. *Qualitative Data Analysis: A Methods Sourcebook*.  
37 798 Thousand Oaks: SAGE publications; 2014.
- 38 799 55. Yin RK. *Case study research design and methods*. 5th ed. ed. Thousand Oaks, CA: Sage; 2014.
- 39 800 56. Brousselle A, Champagne F, Contandriopoulos A, Hartz Z. *L'Évaluation: Concepts et Méthodes*.  
40 801 Brousselle A, Champagne F, Contandriopoulos A, Hartz Z, editors. Canada: Les Presses de l'Université de  
41 802 Montréal; 2011.
- 42 803 57. *Embedded Case Study Methods*. 2002 [cited February 12, 2020]. Thousand Oaks, California:  
43 804 SAGE Publications, Inc., [cited February 12, 2020]. Available from:  
44 805 <https://methods.sagepub.com/book/embedded-case-study-methods>.
- 45 806 58. Canadian Institute for Health Information. *Patient Cost Estimator Canada*: Canadian Institute for  
46 807 Health Information; 2019 [cited 2020 February 12, 2020]. Available from:  
47 808 <https://www.cihi.ca/en/patient-cost-estimator>.
- 48 809 59. Chew LD, Bradley KA, Boyko EJ. Brief questions to identify patients with inadequate health  
49 810 literacy. *Fam Med*. 2004;36(8):588-94.

- 1  
2  
3 811 60. Hudon E, Hudon C, Couture EM, Lavoie M, Lambert M, Bouliane D. Measuring Health Literacy in  
4 812 Primary Health Care: Validation of a French-Language Version of a Three-Item Questionnaire. North  
5 813 American Primary Care Research Group Annual Meeting; Colorado Springs, USA2016.  
6 814 61. Poitras ME, Fortin M, Hudon C, Haggerty J, Almirall J. Validation of the disease burden morbidity  
7 815 assessment by self-report in a French-speaking population. *BMC Health Serv Res.* 2012;12:35.  
8 816 62. Bayliss EA, Ellis JL, Steiner JF. Subjective assessments of comorbidity correlate with quality of life  
9 817 health outcomes: initial validation of a comorbidity assessment instrument. *Health and quality of life*  
10 818 *outcomes.* 2005;3:51.  
11 819 63. Hudon E, Hudon C, Lambert M, Chouinard MC. Validation of a French-language version of a  
12 820 patient-reported measure of integrated care. North American Primary Care Research Group Annual  
13 821 Meeting; Colorado Springs, USA2016.  
14 822 64. Smith D, Harvey P, Lawn S, Harris M, Battersby M. Measuring chronic condition self-  
15 823 management in an Australian community: factor structure of the revised Partners in Health (PIH) scale.  
16 824 *Qual Life Res.* 2017;26(1):149-59.  
17 825 65. Hudon E, Hudon C, Lambert M, Chouinard MC. Measuring self-management of patients with  
18 826 chronic disease in primary care: Validation of a French-language version of the Partner in Health Scale.  
19 827 North American Primary Care Research Group Annual Meeting; Colorado Springs, USA2016.  
20 828 66. Ware J. User manual for the SF-36v2 Health survey second edition. Lincoln, RI: Quality Metric  
21 829 Incorporated; 2007.  
22 830 67. Brazier JE, Roberts J. The estimation of a preference-based measure of health from the SF-12.  
23 831 *Med Care.* 2004;42(9):851-9.  
24 832 68. Kessler RC, Barker PR, Colpe LJ, Epstein JF, Gfroerer JC, Hiripi E, et al. K-6 Distress Scale - Self  
25 833 Administered 2003 [cited 2020 February 12, 2020]. Available from: [http://www.midss.org/content/k-6-](http://www.midss.org/content/k-6-distress-scale-self-administered)  
26 834 [distress-scale-self-administered](http://www.midss.org/content/k-6-distress-scale-self-administered).  
27 835 69. Haynes A, Brennan S, Redman S, Williamson A, Gallego G, Butow P. Figuring out fidelity: a  
28 836 worked example of the methods used to identify, critique and revise the essential elements of a  
29 837 contextualised intervention in health policy agencies. *Implementation Science.* 2016;11(1).  
30 838 70. Breitenstein SM, Gross D, Garvey CA, Hill C, Fogg L, Resnick B. Implementation fidelity in  
31 839 community-based interventions. *Res Nurs Health.* 2010;33(2):164-73.  
32 840 71. Carroll C, Patterson M, Wood S, Booth A, Rick J, Balain S. A conceptual framework for  
33 841 implementation fidelity. *Implementation science : IS.* 2007;2:40.  
34 842 72. Pluye P, Bengoechea EG, Granikov V, Kaur N, Li Tang D. A World of Possibilities in Mixed  
35 843 Methods: Review of the combinations of strategies used to integrate qualitative and quantitative  
36 844 phases, results and data. *International Journal of Multiple Research Approaches.* 2018;10(1):41-56.  
37 845 73. Craig P, Dieppe P, Macintyre S, Michie S, Nazareth I, Petticrew M, et al. Developing and  
38 846 evaluating complex interventions: the new Medical Research Council guidance. *BMJ.* 2008;337:a1655.  
39 847 74. Ramsey S, Willke R, Briggs A, Brown R, Buxton M, Chawla A, et al. Good research practices for  
40 848 cost-effectiveness analysis alongside clinical trials: the ISPOR RCT-CEA Task Force report. *Value Health.*  
41 849 2005;8(5):521-33.  
42 850 75. Fenwick E, O'Brien BJ, Briggs A. Cost-effectiveness acceptability curves--facts, fallacies and  
43 851 frequently asked questions. *Health Econ.* 2004;13(5):405-15.  
44 852 76. Rogers PJ. Using Programme Theory to Evaluate Complicated and Complex Aspects of  
45 853 Interventions. *Evaluation.* 2008;14(1):29-48.  
46 854 77. Rossi PH, Lipsey MW, Freeman HE. Expressing and Assessing Program Theory. In: Sage tE, editor.  
47 855 *Evaluation: A Systematic Approach.* Thousand Oaks, CA2004. p. 152-78.  
48 856 78. Huynh AK, Hamilton AB, Farmer MM, Bean-Mayberry B, Stirman SW, Moin T, et al. A Pragmatic  
49 857 Approach to Guide Implementation Evaluation Research: Strategy Mapping for Complex Interventions.  
50 858 *Front Public Health.* 2018;6:134.

- 1  
2  
3 859 79. Proctor EK, Powell BJ, McMillen JC. Implementation strategies: recommendations for specifying  
4 860 and reporting. *Implementation science* : IS. 2013;8:139.
- 5 861 80. Castiglione SA, Ritchie JA. Moving into action: We know what practices we want to change, now  
6 862 what? An implementation guide for health care practitioners. Ottawa, ON: Canadian Institutes of Health  
7 863 Research; 2012 [cited 2020 February 12]. Available from: [https://www.nccmt.ca/knowledge-](https://www.nccmt.ca/knowledge-repositories/search/159)  
8 864 [repositories/search/159](https://www.nccmt.ca/knowledge-repositories/search/159).
- 9 865 81. Kadu MK, Stolee P. Facilitators and barriers of implementing the chronic care model in primary  
10 866 care: a systematic review. *BMC Fam Pract*. 2015;16:12.
- 11 867 82. Boyd MR, Powell BJ, Endicott D, Lewis CC. A Method for Tracking Implementation Strategies: An  
12 868 Exemplar Implementing Measurement-Based Care in Community Behavioral Health Clinics. *Behav Ther*.  
13 869 2018;49(4):525-37.  
14  
15 870

For peer review only

Figure 1. Conceptual model for the implementation analysis of a case management intervention

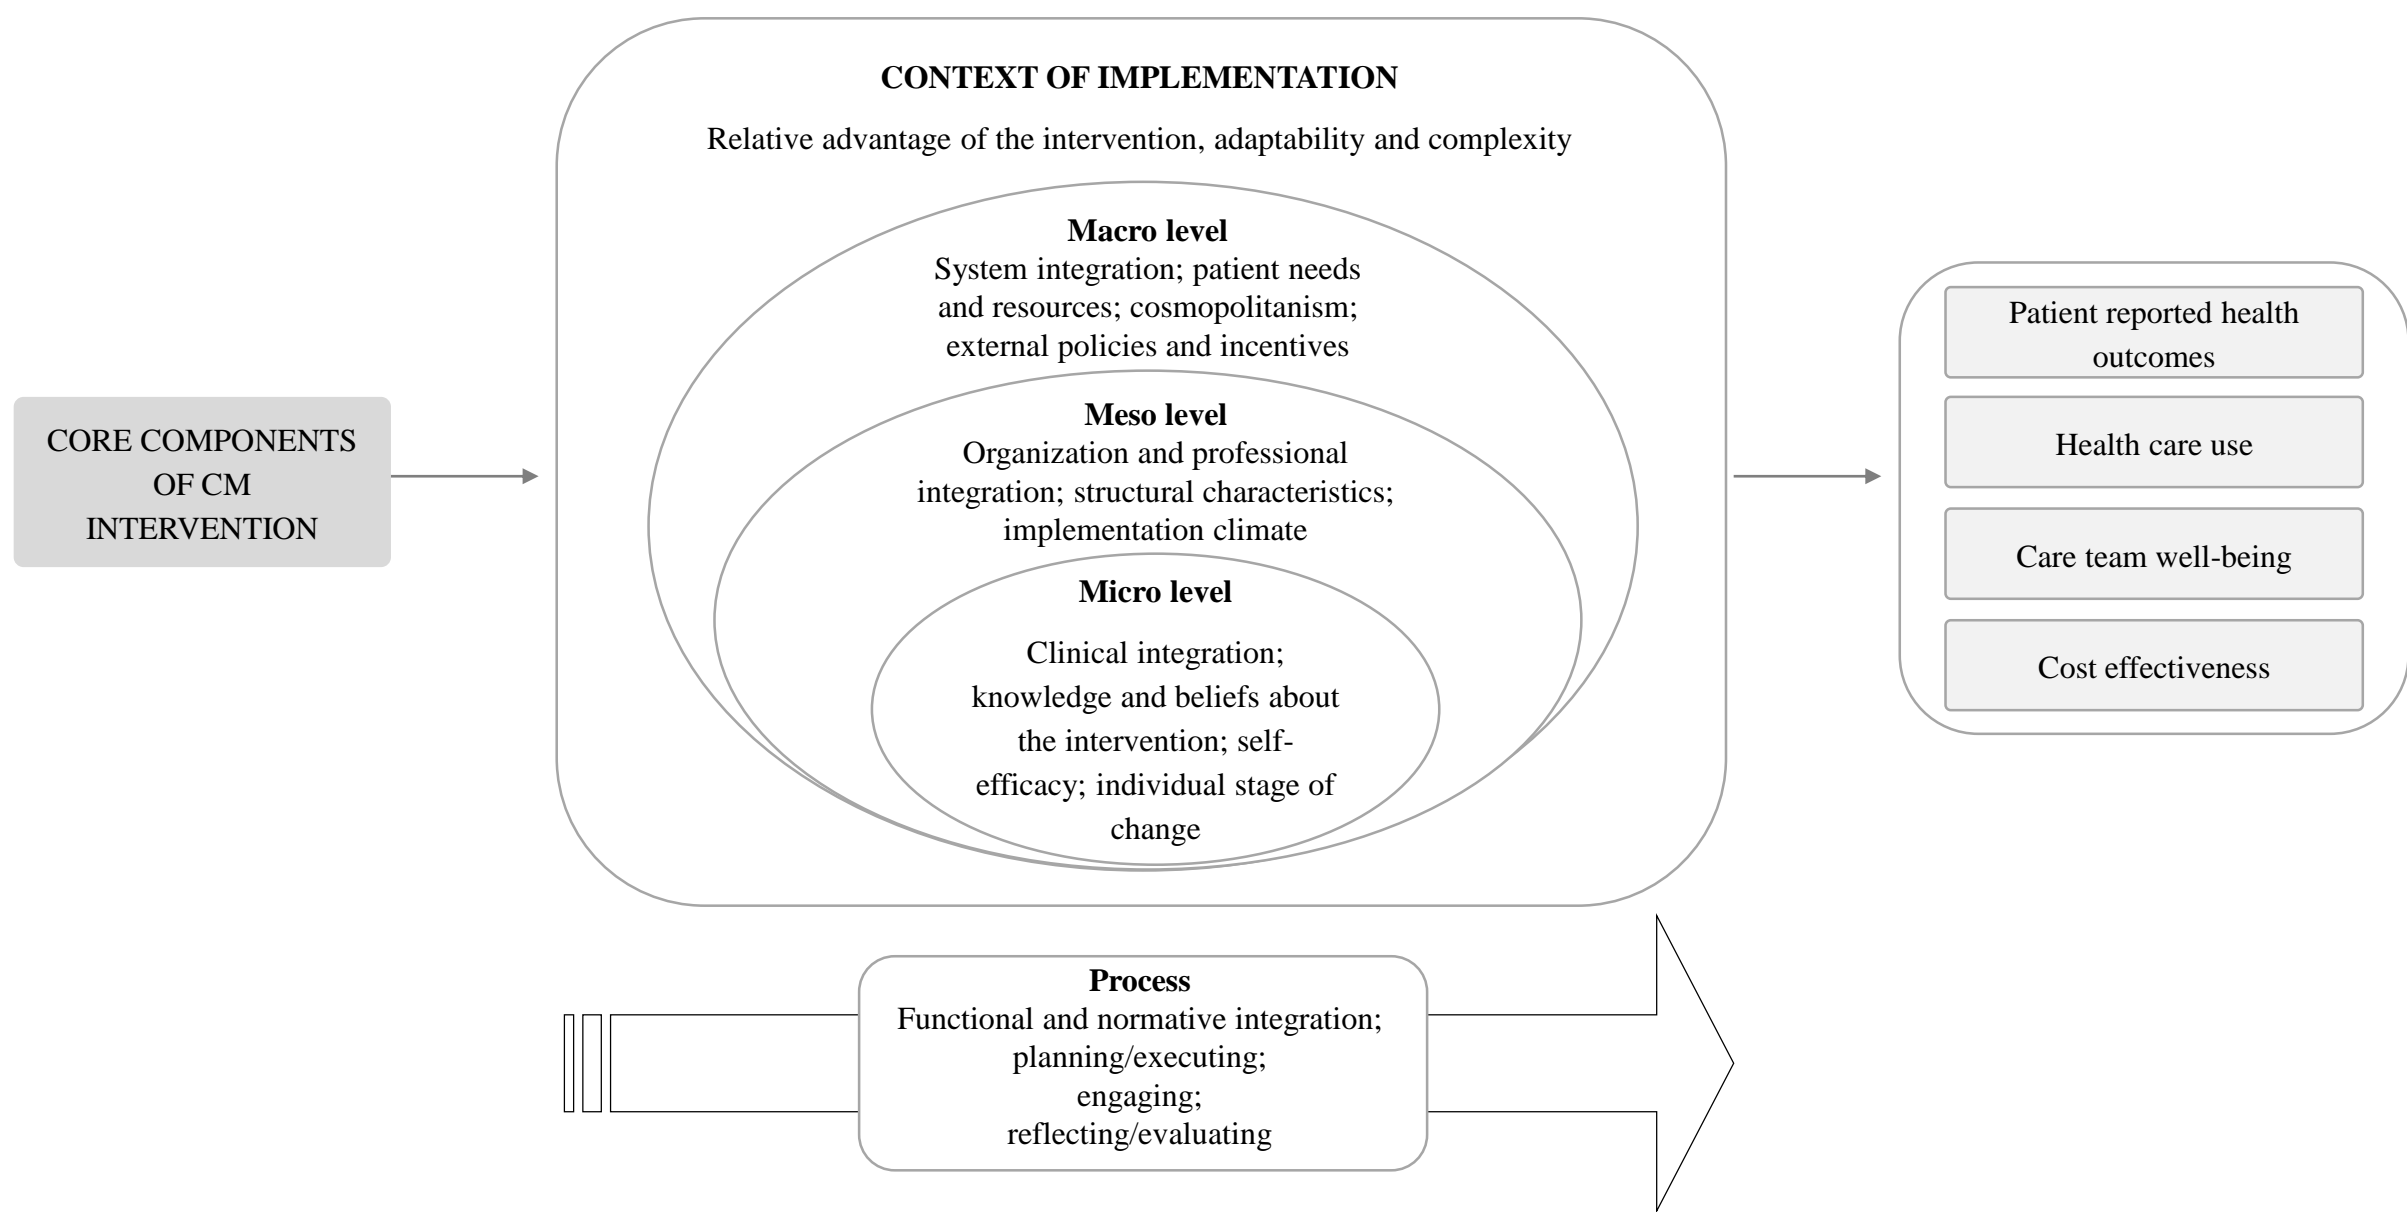

For peer review only - <http://bmjopen.bmj.com/site/about/guidelines.xhtml>
