# Supplementary material for: Protocol for a mixed-method analysis of implementation of case management in primary care for frequent users of healthcare services with chronic diseases and complex care needs
Source: PubMed Central journal article supplement — BMJ Open. 2020 Jun 1;10(6):e038241. doi: 10.1136/bmjopen-2020-038241 (PMC7265033; doi:10.1136/bmjopen-2020-038241), 2020-06-01
Supplement: bmjopen-2020-038241.reviewer_comments.pdf [file bmjopen-2020-038241.reviewer_comments.pdf]

## PEER REVIEW HISTORY

BMJ Open publishes all reviews undertaken for accepted manuscripts. Reviewers are asked to complete a checklist review form (<http://bmjopen.bmj.com/site/about/resources/checklist.pdf>) and are provided with free text boxes to elaborate on their assessment. These free text comments are reproduced below.

## ARTICLE DETAILS

|                            |                                                                                                                                                                                                                                                        |
|----------------------------|--------------------------------------------------------------------------------------------------------------------------------------------------------------------------------------------------------------------------------------------------------|
| <b>TITLE (PROVISIONAL)</b> | Protocol for a mixed-method analysis of implementation of case management in primary care for frequent users of health care services with chronic diseases and complex care needs                                                                      |
| <b>AUTHORS</b>             | Danish, Alya; Chouinard, Maud-Christine; Aubrey-Bassler, Kris; Burge, Fred; Doucet, Shelley; Ramsden, Vivian; Bisson, Mathieu; Cassidy, Monique; Condran, Brian; Lambert, Mireille; Penney, Carla; Sabourin, Véronique; Warren, Mike; Hudon, Catherine |

This article was not externally reviewed at BMJ Open. Protocols that have been independently assessed prior to submission to BMJ Open are usually fast-tracked to publication on the grounds that further substantial changes will not be possible. This independent assessment will usually be external, independent review for both a substantial grant award from a non-commercial or government funder and ethics approval.
